# Supplementary material for: Propensity of formation of zipper architecture vs. Lincoln log arrangement in solvated molecular complexes of melamine with hydroxybenzoic acids
Source: Royal Society of Chemistry journal article supplement (doi:10.1039/c1ce05179b), 2011-01-01
Supplement: c1ce05179b.pdf [file c1ce05179b.pdf]

*Supplementary Information*

**Propensity of formation of zipper architecture vs. Lincoln log arrangement in solvated molecular complexes of melamine with hydroxybenzoic acids**

Seetha Lekshmi Sunil and T. N. Guru Row\*

*Index*

| <b>No.</b> |                                                          | <b>Page</b> |
|------------|----------------------------------------------------------|-------------|
| 1.         | Crystallographic Information for <b>2</b>                | 2           |
| 2.         | Crystallographic Information for <b>3</b>                | 7           |
| 3.         | Crystallographic Information for <b>4</b>                | 13          |
| 4.         | Crystallographic Information for <b>5</b>                | 19          |
| 5.         | Crystallographic Information for <b>6</b>                | 23          |
| 6.         | Crystallographic Information for <b>7</b>                | 29          |
| 7.         | Thermogravimetric Analysis                               | 34          |
| 8.         | PXRD Analysis                                            | 36          |
| 9.         | Structures of the <b>BA-ML</b> complexes                 | 37          |
| 10.        | CSD search on the conformation of dihydroxybenzoic acids | 38          |

## Crystallographic Information for 2

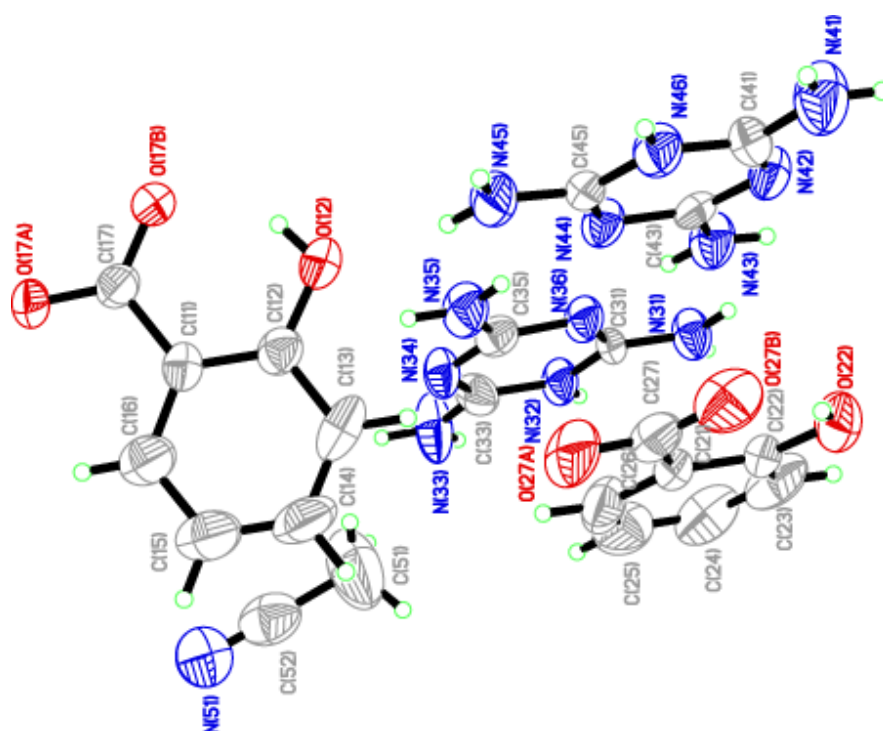

**Figure 1.** ORTEP drawing of the asymmetric unit of the complex **2**.

Table 1. Crystal data and structure refinement for **2**.

|                        |                                    |                             |
|------------------------|------------------------------------|-----------------------------|
| Identification code    | <b>2</b>                           |                             |
| Empirical formula      | $C_{22} H_{27} N_{13} O_6$         |                             |
| Formula weight         | 569.57                             |                             |
| Temperature            | 298(2) K                           |                             |
| Wavelength             | 0.71073 Å                          |                             |
| Crystal system         | Monoclinic                         |                             |
| Space group            | $P2_1/c$                           |                             |
| Unit cell dimensions   | $a = 16.691(8)$ Å                  | $\alpha = 90^\circ$ .       |
|                        | $b = 8.577(4)$ Å                   | $\beta = 117.83(3)^\circ$ . |
|                        | $c = 20.692(8)$ Å                  | $\gamma = 90^\circ$ .       |
| Volume                 | $2620(2)$ Å <sup>3</sup>           |                             |
| Z                      | 4                                  |                             |
| Density (calculated)   | 1.444 Mg/m <sup>3</sup>            |                             |
| Absorption coefficient | 0.110 mm <sup>-1</sup>             |                             |
| $F(000)$               | 1192                               |                             |
| Crystal size           | 0.14 x 0.11 x 0.09 mm <sup>3</sup> |                             |

|                                   |                                             |
|-----------------------------------|---------------------------------------------|
| Theta range for data collection   | 2.00 to 25.00°.                             |
| Index ranges                      | -15<=h<=18, -10<=k<=10, -24<=l<=3           |
| Reflections collected             | 5980                                        |
| Independent reflections           | 4203 [R(int) = 0.0539]                      |
| Completeness to theta = 25.00°    | 91.1 %                                      |
| Absorption correction             | Semi-empirical from equivalents             |
| Max. and min. transmission        | 0.9902 and 0.9848                           |
| Refinement method                 | Full-matrix least-squares on F <sup>2</sup> |
| Data / restraints / parameters    | 4203 / 0 / 371                              |
| Goodness-of-fit on F <sup>2</sup> | 0.689                                       |
| Final R indices [I>2sigma(I)]     | R1 = 0.0712, wR2 = 0.1620                   |
| R indices (all data)              | R1 = 0.1660, wR2 = 0.1805                   |
| Largest diff. peak and hole       | 0.358 and -0.341 e.Å <sup>-3</sup>          |

Table 2. Atomic coordinates (x 10<sup>4</sup>) and equivalent isotropic displacement parameters (Å<sup>2</sup>x 10<sup>3</sup>) for **2**. U(eq) is defined as one third of the trace of the orthogonalized U<sup>ij</sup> tensor.

|        | x       | y       | z       | U(eq) |
|--------|---------|---------|---------|-------|
| N(31)  | 3562(2) | 2574(5) | 6962(2) | 54(1) |
| N(32)  | 2205(3) | 1953(5) | 6005(2) | 47(1) |
| N(33)  | 845(3)  | 1271(6) | 5076(2) | 79(2) |
| N(34)  | 1766(3) | 2885(5) | 4829(2) | 49(1) |
| N(35)  | 2790(3) | 4466(5) | 4700(2) | 59(1) |
| N(36)  | 3222(3) | 3545(5) | 5836(2) | 45(1) |
| N(41)  | 7030(3) | 8609(6) | 6397(2) | 78(2) |
| N(42)  | 6003(3) | 6920(5) | 6474(2) | 47(1) |
| N(43)  | 4925(3) | 5300(5) | 6450(2) | 57(1) |
| N(44)  | 4623(3) | 6380(5) | 5367(2) | 43(1) |
| N(45)  | 4432(3) | 7637(5) | 4311(2) | 56(1) |
| N(46)  | 5732(3) | 8092(5) | 5378(2) | 52(1) |
| C(31)  | 2993(3) | 2707(6) | 6264(2) | 35(1) |
| C(33)  | 1599(4) | 2047(7) | 5286(3) | 48(2) |
| C(35)  | 2570(4) | 3590(6) | 5131(3) | 42(1) |
| C(41)  | 6256(4) | 7862(7) | 6093(3) | 51(2) |
| C(43)  | 5209(4) | 6238(7) | 6089(3) | 41(2) |
| C(45)  | 4931(4) | 7352(6) | 5023(3) | 40(1) |
| O(12)  | 2705(2) | 6033(4) | 3294(2) | 60(1) |
| O(17A) | 662(2)  | 5303(4) | 1197(2) | 58(1) |
| O(17B) | 2057(2) | 4761(4) | 2048(2) | 53(1) |
| C(11)  | 1205(4) | 6567(6) | 2339(2) | 40(1) |
| C(12)  | 1906(4) | 6809(6) | 3035(3) | 44(2) |
| C(13)  | 1797(5) | 7863(7) | 3504(3) | 64(2) |
| C(14)  | 1010(5) | 8658(8) | 3277(3) | 75(2) |
| C(15)  | 314(4)  | 8416(7) | 2600(4) | 71(2) |
| C(16)  | 401(4)  | 7381(7) | 2126(3) | 60(2) |
| C(17)  | 1318(4) | 5474(6) | 1827(3) | 42(2) |
| O(22)  | 4695(2) | 8961(5) | 7162(2) | 66(1) |
| O(27A) | 3229(3) | 9949(5) | 5007(2) | 76(1) |

|        |          |          |         |        |
|--------|----------|----------|---------|--------|
| O(27B) | 4493(3)  | 10182(5) | 6030(2) | 72(1)  |
| C(21)  | 3350(4)  | 8579(6)  | 6045(2) | 38(1)  |
| C(22)  | 3884(4)  | 8268(6)  | 6782(3) | 45(2)  |
| C(23)  | 3563(5)  | 7283(7)  | 7146(3) | 70(2)  |
| C(24)  | 2745(5)  | 6606(7)  | 6780(4) | 76(2)  |
| C(25)  | 2214(4)  | 6904(8)  | 6053(4) | 77(2)  |
| C(26)  | 2527(4)  | 7885(7)  | 5687(3) | 63(2)  |
| C(27)  | 3723(4)  | 9628(7)  | 5655(3) | 51(2)  |
| N(51)  | -1457(4) | 6287(7)  | 2940(3) | 88(2)  |
| C(51)  | 117(4)   | 5915(9)  | 4073(3) | 122(3) |
| C(52)  | -781(5)  | 6106(8)  | 3437(4) | 73(2)  |

Table 3. Bond lengths [Å] and angles [°] for **2**.

|              |          |                     |          |
|--------------|----------|---------------------|----------|
| N(31)-C(31)  | 1.311(5) | C(31)-N(31)-H(31B)  | 120.0    |
| N(31)-H(31B) | 0.8600   | C(31)-N(31)-H(32B)  | 120.0    |
| N(31)-H(32B) | 0.8599   | H(31B)-N(31)-H(32B) | 120.0    |
| N(32)-C(31)  | 1.334(5) | C(31)-N(32)-C(33)   | 120.2(4) |
| N(32)-C(33)  | 1.356(5) | C(31)-N(32)-H(32)   | 119.9    |
| N(32)-H(32)  | 0.8600   | C(33)-N(32)-H(32)   | 119.9    |
| N(33)-C(33)  | 1.306(6) | C(33)-N(33)-H(33B)  | 120.0    |
| N(33)-H(33B) | 0.8599   | C(33)-N(33)-H(33A)  | 120.0    |
| N(33)-H(33A) | 0.8601   | H(33B)-N(33)-H(33A) | 120.0    |
| N(34)-C(33)  | 1.318(6) | C(33)-N(34)-C(35)   | 114.5(5) |
| N(34)-C(35)  | 1.333(6) | C(35)-N(35)-H(35A)  | 119.9    |
| N(35)-C(35)  | 1.341(6) | C(35)-N(35)-H(35B)  | 120.1    |
| N(35)-H(35A) | 0.8600   | H(35A)-N(35)-H(35B) | 120.0    |
| N(35)-H(35B) | 0.8600   | C(31)-N(36)-C(35)   | 113.5(5) |
| N(36)-C(31)  | 1.327(6) | C(41)-N(41)-H(41B)  | 119.9    |
| N(36)-C(35)  | 1.354(6) | C(41)-N(41)-H(41A)  | 120.1    |
| N(41)-C(41)  | 1.311(6) | H(41B)-N(41)-H(41A) | 120.0    |
| N(41)-H(41B) | 0.8600   | C(43)-N(42)-C(41)   | 114.8(5) |
| N(41)-H(41A) | 0.8600   | C(43)-N(43)-H(43A)  | 120.0    |
| N(42)-C(43)  | 1.321(6) | C(43)-N(43)-H(43B)  | 120.0    |
| N(42)-C(41)  | 1.326(6) | H(43A)-N(43)-H(43B) | 120.0    |
| N(43)-C(43)  | 1.327(6) | C(45)-N(44)-C(43)   | 112.4(5) |
| N(43)-H(43A) | 0.8600   | C(45)-N(45)-H(45B)  | 120.0    |
| N(43)-H(43B) | 0.8600   | C(45)-N(45)-H(45A)  | 120.0    |
| N(44)-C(45)  | 1.344(6) | H(45B)-N(45)-H(45A) | 120.0    |
| N(44)-C(43)  | 1.357(5) | C(41)-N(46)-C(45)   | 120.3(5) |
| N(45)-C(45)  | 1.333(5) | C(41)-N(46)-H(46)   | 119.9    |
| N(45)-H(45B) | 0.8601   | C(45)-N(46)-H(46)   | 119.8    |
| N(45)-H(45A) | 0.8600   | N(31)-C(31)-N(36)   | 119.7(5) |
| N(46)-C(41)  | 1.336(6) | N(31)-C(31)-N(32)   | 118.2(5) |
| N(46)-C(45)  | 1.346(6) | N(36)-C(31)-N(32)   | 122.1(4) |
| N(46)-H(46)  | 0.8600   | N(33)-C(33)-N(34)   | 122.1(5) |
| O(12)-C(12)  | 1.358(5) | N(33)-C(33)-N(32)   | 116.4(5) |
| O(12)-H(12)  | 0.8201   | N(34)-C(33)-N(32)   | 121.4(5) |
| O(17A)-C(17) | 1.258(5) | N(34)-C(35)-N(35)   | 118.1(5) |
| O(17B)-C(17) | 1.257(5) | N(34)-C(35)-N(36)   | 128.2(5) |
| C(11)-C(12)  | 1.382(6) | N(35)-C(35)-N(36)   | 113.7(5) |
| C(11)-C(16)  | 1.389(6) | N(41)-C(41)-N(42)   | 121.9(6) |
| C(11)-C(17)  | 1.492(7) | N(41)-C(41)-N(46)   | 116.6(6) |
| C(12)-C(13)  | 1.399(7) | N(42)-C(41)-N(46)   | 121.5(5) |
| C(13)-C(14)  | 1.355(7) | N(42)-C(43)-N(43)   | 116.9(5) |

|              |          |                     |          |
|--------------|----------|---------------------|----------|
| C(13)-H(13)  | 0.9300   | N(42)-C(43)-N(44)   | 128.9(5) |
| C(14)-C(15)  | 1.355(7) | N(43)-C(43)-N(44)   | 114.3(5) |
| C(14)-H(14)  | 0.9300   | N(45)-C(45)-N(44)   | 120.2(5) |
| C(15)-C(16)  | 1.380(7) | N(45)-C(45)-N(46)   | 117.8(5) |
| C(15)-H(4A)  | 0.9300   | N(44)-C(45)-N(46)   | 122.1(5) |
| C(16)-H(15)  | 0.9300   | C(12)-O(12)-H(12)   | 109.4    |
| O(22)-C(22)  | 1.345(6) | C(12)-C(11)-C(16)   | 118.5(5) |
| O(22)-H(22)  | 0.8201   | C(12)-C(11)-C(17)   | 120.6(5) |
| O(27A)-C(27) | 1.233(6) | C(16)-C(11)-C(17)   | 120.9(5) |
| O(27B)-C(27) | 1.245(6) | O(12)-C(12)-C(11)   | 122.4(5) |
| C(21)-C(26)  | 1.356(6) | O(12)-C(12)-C(13)   | 117.7(5) |
| C(21)-C(22)  | 1.385(6) | C(11)-C(12)-C(13)   | 119.9(6) |
| C(21)-C(27)  | 1.523(7) | C(14)-C(13)-C(12)   | 120.3(6) |
| C(22)-C(23)  | 1.395(7) | C(14)-C(13)-H(13)   | 119.9    |
| C(23)-C(24)  | 1.345(7) | C(12)-C(13)-H(13)   | 119.9    |
| C(23)-H(23)  | 0.9300   | C(15)-C(14)-C(13)   | 120.4(6) |
| C(24)-C(25)  | 1.368(7) | C(15)-C(14)-H(14)   | 119.8    |
| C(24)-H(24)  | 0.9300   | C(13)-C(14)-H(14)   | 119.8    |
| C(25)-C(26)  | 1.387(8) | C(14)-C(15)-C(16)   | 120.6(6) |
| C(25)-H(25)  | 0.9300   | C(14)-C(15)-H(4A)   | 119.7    |
| C(26)-H(26)  | 0.9300   | C(16)-C(15)-H(4A)   | 119.7    |
| N(51)-C(52)  | 1.128(7) | C(15)-C(16)-C(11)   | 120.3(6) |
| C(51)-C(52)  | 1.470(8) | C(15)-C(16)-H(15)   | 119.9    |
| C(51)-H(51B) | 0.9600   | C(11)-C(16)-H(15)   | 119.9    |
| C(51)-H(1B)  | 0.9600   | O(17B)-C(17)-O(17A) | 123.5(5) |
| C(51)-H(51A) | 0.9600   | O(17B)-C(17)-C(11)  | 118.3(5) |
|              |          | O(17A)-C(17)-C(11)  | 118.2(5) |
|              |          | C(22)-O(22)-H(22)   | 109.4    |
|              |          | C(26)-C(21)-C(22)   | 119.0(5) |
|              |          | C(26)-C(21)-C(27)   | 122.0(5) |
|              |          | C(22)-C(21)-C(27)   | 119.0(5) |
|              |          | O(22)-C(22)-C(21)   | 120.9(5) |
|              |          | O(22)-C(22)-C(23)   | 119.1(5) |
|              |          | C(21)-C(22)-C(23)   | 119.9(6) |
|              |          | C(24)-C(23)-C(22)   | 120.2(6) |
|              |          | C(24)-C(23)-H(23)   | 119.9    |
|              |          | C(22)-C(23)-H(23)   | 119.9    |
|              |          | C(23)-C(24)-C(25)   | 120.3(7) |
|              |          | C(23)-C(24)-H(24)   | 119.9    |
|              |          | C(25)-C(24)-H(24)   | 119.9    |
|              |          | C(24)-C(25)-C(26)   | 119.8(6) |
|              |          | C(24)-C(25)-H(25)   | 120.1    |
|              |          | C(26)-C(25)-H(25)   | 120.1    |
|              |          | C(21)-C(26)-C(25)   | 120.8(6) |
|              |          | C(21)-C(26)-H(26)   | 119.6    |
|              |          | C(25)-C(26)-H(26)   | 119.6    |
|              |          | O(27A)-C(27)-O(27B) | 124.4(6) |
|              |          | O(27A)-C(27)-C(21)  | 118.5(6) |
|              |          | O(27B)-C(27)-C(21)  | 117.0(5) |
|              |          | C(52)-C(51)-H(51B)  | 109.5    |
|              |          | C(52)-C(51)-H(1B)   | 109.5    |
|              |          | H(51B)-C(51)-H(1B)  | 109.5    |
|              |          | C(52)-C(51)-H(51A)  | 109.5    |
|              |          | H(51B)-C(51)-H(51A) | 109.5    |
|              |          | H(1B)-C(51)-H(51A)  | 109.5    |
|              |          | N(51)-C(52)-C(51)   | 177.7(8) |

Symmetry transformations used to generate equivalent atoms:

Table 4. Anisotropic displacement parameters ( $\text{\AA}^2 \times 10^3$ ) for **2**. The anisotropic displacement factor exponent takes the form:  $-2\pi^2 [ h^2 a^*U^{11} + \dots + 2 h k a^* b^* U^{12} ]$

|        | U <sup>11</sup> | U <sup>22</sup> | U <sup>33</sup> | U <sup>23</sup> | U <sup>13</sup> | U <sup>12</sup> |
|--------|-----------------|-----------------|-----------------|-----------------|-----------------|-----------------|
| N(31)  | 47(3)           | 79(4)           | 34(2)           | 7(2)            | 17(2)           | -10(3)          |
| N(32)  | 50(3)           | 60(3)           | 27(2)           | 9(2)            | 16(2)           | 0(3)            |
| N(33)  | 69(4)           | 114(5)          | 36(3)           | 10(3)           | 10(3)           | -37(4)          |
| N(34)  | 50(3)           | 61(3)           | 29(2)           | 6(2)            | 12(2)           | -2(3)           |
| N(35)  | 65(3)           | 76(4)           | 38(2)           | 12(2)           | 26(2)           | 0(3)            |
| N(36)  | 54(3)           | 50(3)           | 29(2)           | 8(2)            | 17(2)           | 6(3)            |
| N(41)  | 76(4)           | 106(5)          | 49(3)           | -4(3)           | 28(3)           | -24(4)          |
| N(42)  | 54(3)           | 54(3)           | 34(2)           | -6(2)           | 22(3)           | -10(3)          |
| N(43)  | 66(3)           | 70(3)           | 36(2)           | 6(2)            | 25(2)           | -7(3)           |
| N(44)  | 48(3)           | 51(3)           | 34(2)           | -1(2)           | 23(2)           | -7(3)           |
| N(45)  | 55(3)           | 82(4)           | 33(2)           | 9(2)            | 23(2)           | 4(3)            |
| N(46)  | 51(3)           | 70(4)           | 40(3)           | 0(2)            | 25(2)           | -6(3)           |
| C(31)  | 24(3)           | 46(4)           | 28(3)           | -7(3)           | 7(3)            | -2(3)           |
| C(33)  | 45(4)           | 56(4)           | 44(4)           | 16(3)           | 21(3)           | 10(4)           |
| C(35)  | 51(4)           | 39(4)           | 41(3)           | 2(3)            | 27(3)           | 2(3)            |
| C(41)  | 34(4)           | 66(5)           | 46(4)           | -14(3)          | 12(3)           | -6(4)           |
| C(43)  | 45(4)           | 44(4)           | 36(3)           | -9(3)           | 22(3)           | 8(3)            |
| C(45)  | 32(4)           | 50(4)           | 35(3)           | -12(3)          | 13(3)           | 2(3)            |
| O(12)  | 62(3)           | 80(3)           | 33(2)           | -6(2)           | 19(2)           | 11(3)           |
| O(17A) | 37(2)           | 94(3)           | 32(2)           | -14(2)          | 8(2)            | 2(2)            |
| O(17B) | 49(3)           | 70(3)           | 38(2)           | -2(2)           | 19(2)           | 16(2)           |
| C(11)  | 42(4)           | 44(4)           | 32(3)           | 0(3)            | 16(3)           | -5(3)           |
| C(12)  | 53(4)           | 47(4)           | 38(3)           | 4(3)            | 25(3)           | 2(3)            |
| C(13)  | 98(6)           | 62(5)           | 43(3)           | -14(3)          | 41(4)           | -16(4)          |
| C(14)  | 101(6)          | 79(5)           | 69(5)           | 5(4)            | 61(5)           | 29(5)           |
| C(15)  | 85(5)           | 68(5)           | 80(5)           | 6(4)            | 55(5)           | 17(4)           |
| C(16)  | 77(5)           | 55(4)           | 60(4)           | 8(3)            | 42(4)           | 14(4)           |
| C(17)  | 46(4)           | 45(4)           | 38(3)           | -3(3)           | 22(3)           | 0(3)            |
| O(22)  | 68(3)           | 89(3)           | 35(2)           | 1(2)            | 20(2)           | 4(3)            |
| O(27A) | 102(3)          | 94(3)           | 36(2)           | 16(2)           | 37(2)           | 15(3)           |
| O(27B) | 87(3)           | 77(3)           | 77(3)           | 0(2)            | 59(3)           | -12(3)          |
| C(21)  | 38(4)           | 44(4)           | 32(3)           | -4(3)           | 17(3)           | 1(3)            |
| C(22)  | 38(4)           | 53(4)           | 36(3)           | -15(3)          | 12(3)           | 1(3)            |
| C(23)  | 125(7)          | 57(5)           | 56(4)           | 16(4)           | 65(5)           | 18(5)           |
| C(24)  | 117(6)          | 55(5)           | 85(5)           | -7(4)           | 70(5)           | -13(5)          |
| C(25)  | 63(5)           | 88(6)           | 98(5)           | -24(4)          | 53(5)           | -20(4)          |
| C(26)  | 62(5)           | 77(5)           | 51(4)           | -25(3)          | 26(4)           | -18(4)          |
| C(27)  | 68(5)           | 44(4)           | 48(4)           | -2(3)           | 33(4)           | 7(4)            |
| N(51)  | 89(5)           | 96(5)           | 74(4)           | 4(4)            | 33(3)           | 12(4)           |
| C(51)  | 96(6)           | 164(8)          | 74(5)           | 29(5)           | 13(5)           | 6(6)            |
| C(52)  | 93(6)           | 71(5)           | 79(5)           | 11(5)           | 61(5)           | 8(6)            |

Table 5. Hydrogen coordinates ( $\times 10^4$ ) and isotropic displacement parameters ( $\text{\AA}^2 \times 10^{-3}$ ) for **2**.

|        | x    | y    | z    | U(eq) |
|--------|------|------|------|-------|
| H(31B) | 3423 | 2012 | 7239 | 65    |
| H(32B) | 4075 | 3049 | 7142 | 65    |
| H(32)  | 2081 | 1406 | 6295 | 56    |
| H(33B) | 437  | 1298 | 4625 | 94    |
| H(33A) | 755  | 734  | 5387 | 94    |
| H(35A) | 2415 | 4559 | 4243 | 70    |
| H(35B) | 3304 | 4935 | 4880 | 70    |
| H(41B) | 7391 | 8495 | 6856 | 93    |
| H(41A) | 7178 | 9212 | 6138 | 93    |
| H(43A) | 5253 | 5160 | 6912 | 68    |
| H(43B) | 4412 | 4831 | 6222 | 68    |
| H(45B) | 4625 | 8276 | 4094 | 67    |
| H(45A) | 3918 | 7182 | 4069 | 67    |
| H(46)  | 5906 | 8716 | 5143 | 62    |
| H(12)  | 2698 | 5459 | 2975 | 89    |
| H(13)  | 2267 | 8019 | 3973 | 77    |
| H(14)  | 947  | 9374 | 3588 | 89    |
| H(4A)  | -228 | 8953 | 2454 | 86    |
| H(15)  | -81  | 7228 | 1662 | 72    |
| H(22)  | 4790 | 9543 | 6891 | 98    |
| H(23)  | 3916 | 7094 | 7643 | 84    |
| H(24)  | 2540 | 5932 | 7023 | 91    |
| H(25)  | 1644 | 6450 | 5804 | 93    |
| H(26)  | 2169 | 8069 | 5190 | 76    |
| H(51B) | 183  | 6647 | 4446 | 183   |
| H(1B)  | 578  | 6098 | 3929 | 183   |
| H(51A) | 175  | 4873 | 4260 | 183   |

### Crystallographic Information for **3**

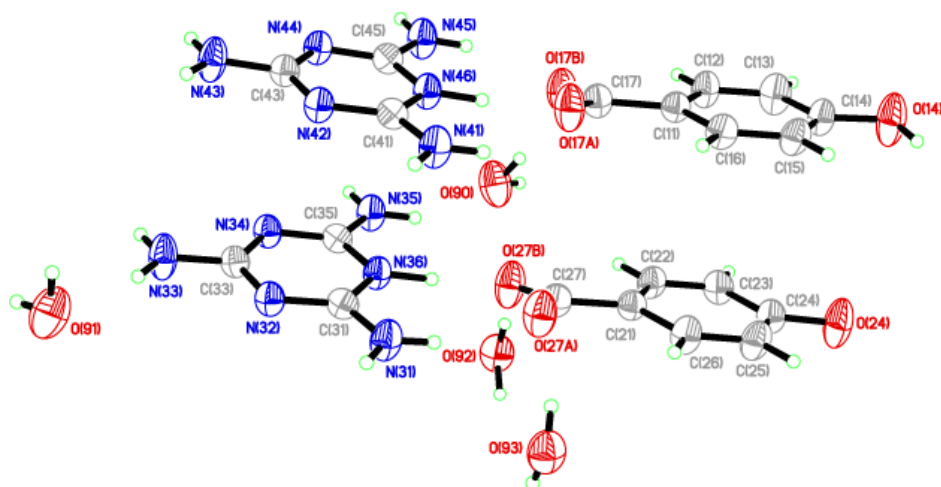

Figure 2. ORTEP drawing of the asymmetric unit of the complex **3**.

Table 1. Crystal data and structure refinement for **3**.

|                                          |                                                               |                        |
|------------------------------------------|---------------------------------------------------------------|------------------------|
| Identification code                      | <b>3</b>                                                      |                        |
| Empirical formula                        | C <sub>10</sub> H <sub>16</sub> N <sub>6</sub> O <sub>5</sub> |                        |
| Formula weight                           | 300.29                                                        |                        |
| Temperature                              | 298(2) K                                                      |                        |
| Wavelength                               | 0.71073 Å                                                     |                        |
| Crystal system                           | Triclinic                                                     |                        |
| Space group                              | <i>P</i> $\bar{1}$                                            |                        |
| Unit cell dimensions                     | <i>a</i> = 7.571 Å                                            | $\alpha$ = 87.120(5)°. |
|                                          | <i>b</i> = 10.8570(10) Å                                      | $\beta$ = 85.510(5)°.  |
|                                          | <i>c</i> = 16.4770(10) Å                                      | $\gamma$ = 82.630(5)°. |
| Volume                                   | 1337.96(15) Å <sup>3</sup>                                    |                        |
| Z                                        | 4                                                             |                        |
| Density (calculated)                     | 1.491 Mg/m <sup>3</sup>                                       |                        |
| Absorption coefficient                   | 0.121 mm <sup>-1</sup>                                        |                        |
| <i>F</i> (000)                           | 632                                                           |                        |
| Crystal size                             | 0.16 x 0.11 x 0.10 mm <sup>3</sup>                            |                        |
| Theta range for data collection          | 2.22 to 25.23°.                                               |                        |
| Index ranges                             | -9 ≤ <i>h</i> ≤ 9, -13 ≤ <i>k</i> ≤ 13, -19 ≤ <i>l</i> ≤ 19   |                        |
| Reflections collected                    | 25272                                                         |                        |
| Independent reflections                  | 4818 [R(int) = 0.0560]                                        |                        |
| Completeness to theta = 25.23°           | 100.0 %                                                       |                        |
| Absorption correction                    | Semi-empirical from equivalents                               |                        |
| Max. and min. transmission               | 0.9880 and 0.9809                                             |                        |
| Refinement method                        | Full-matrix least-squares on <i>F</i> <sup>2</sup>            |                        |
| Data / restraints / parameters           | 4818 / 2 / 379                                                |                        |
| Goodness-of-fit on <i>F</i> <sup>2</sup> | 0.944                                                         |                        |
| Final <i>R</i> indices [I > 2σ(I)]       | <i>R</i> 1 = 0.0459, <i>wR</i> 2 = 0.1032                     |                        |
| <i>R</i> indices (all data)              | <i>R</i> 1 = 0.0837, <i>wR</i> 2 = 0.1119                     |                        |
| Largest diff. peak and hole              | 0.195 and -0.258 e.Å <sup>-3</sup>                            |                        |



Table 2. Atomic coordinates ( $\times 10^4$ ) and equivalent isotropic displacement parameters ( $\text{\AA}^2 \times 10^3$ ) for **3**.  
 $U(\text{eq})$  is defined as one third of the trace of the orthogonalized  $U^{ij}$  tensor.

|        | x        | y       | z        | U(eq) |
|--------|----------|---------|----------|-------|
| N(31)  | 3446(2)  | 4124(2) | 954(1)   | 43(1) |
| N(32)  | 4256(2)  | 3259(2) | -289(1)  | 33(1) |
| N(33)  | 5145(3)  | 2287(2) | -1465(1) | 47(1) |
| N(34)  | 6137(2)  | 1290(2) | -308(1)  | 33(1) |
| N(35)  | 6985(2)  | 394(2)  | 918(1)   | 39(1) |
| N(36)  | 5224(2)  | 2265(2) | 923(1)   | 33(1) |
| C(31)  | 4298(3)  | 3225(2) | 510(1)   | 31(1) |
| C(33)  | 5181(3)  | 2277(2) | -671(1)  | 30(1) |
| C(35)  | 6116(3)  | 1309(2) | 496(1)   | 29(1) |
| N(41)  | 7951(2)  | 4579(2) | 1065(1)  | 41(1) |
| N(42)  | 8847(2)  | 3685(2) | -157(1)  | 32(1) |
| N(43)  | 9901(2)  | 2690(2) | -1318(1) | 44(1) |
| N(44)  | 10708(2) | 1707(2) | -131(1)  | 33(1) |
| N(45)  | 11458(2) | 834(2)  | 1117(1)  | 44(1) |
| N(46)  | 9675(2)  | 2697(2) | 1082(1)  | 34(1) |
| C(41)  | 8825(3)  | 3663(2) | 647(1)   | 30(1) |
| C(43)  | 9813(3)  | 2694(2) | -520(1)  | 31(1) |
| C(45)  | 10619(3) | 1731(2) | 674(1)   | 31(1) |
| O(14)  | 10186(2) | 2647(2) | 6471(1)  | 62(1) |
| O(17A) | 9534(2)  | 3112(1) | 2645(1)  | 49(1) |
| O(17B) | 10456(2) | 1100(1) | 2819(1)  | 48(1) |
| C(11)  | 10019(3) | 2324(2) | 3985(1)  | 32(1) |
| C(12)  | 10792(3) | 1365(2) | 4479(1)  | 39(1) |
| C(13)  | 10829(3) | 1483(2) | 5302(1)  | 46(1) |
| C(14)  | 10081(3) | 2576(2) | 5656(1)  | 37(1) |
| C(15)  | 9287(3)  | 3537(2) | 5175(1)  | 39(1) |
| C(16)  | 9262(3)  | 3413(2) | 4354(1)  | 36(1) |
| C(17)  | 10006(3) | 2171(2) | 3093(1)  | 36(1) |
| O(24)  | 4989(2)  | 2394(2) | 6330(1)  | 58(1) |
| O(27A) | 4404(2)  | 3865(1) | 2599(1)  | 49(1) |
| O(27B) | 5284(2)  | 1847(1) | 2505(1)  | 51(1) |
| C(21)  | 4943(3)  | 2667(2) | 3816(1)  | 32(1) |
| C(22)  | 5698(3)  | 1579(2) | 4202(1)  | 34(1) |
| C(23)  | 5741(3)  | 1471(2) | 5030(1)  | 37(1) |
| C(24)  | 5004(3)  | 2445(2) | 5505(1)  | 36(1) |
| C(25)  | 4251(3)  | 3538(2) | 5132(1)  | 42(1) |
| C(26)  | 4226(3)  | 3647(2) | 4305(1)  | 39(1) |
| C(27)  | 4879(3)  | 2794(2) | 2921(1)  | 37(1) |
| O(91)  | 3412(2)  | 4246(2) | -2591(1) | 60(1) |
| O(93)  | 1108(2)  | 5343(1) | 2697(1)  | 50(1) |
| O(90)  | 8250(2)  | -715(2) | 2474(1)  | 59(1) |
| O(92)  | 3718(2)  | -382(1) | 2810(1)  | 50(1) |

Table 3. Bond lengths [Å] and angles [°] for **3**.

|              |          |                     |            |
|--------------|----------|---------------------|------------|
| N(31)-C(31)  | 1.320(3) | C(31)-N(31)-H(31B)  | 120.1      |
| N(31)-H(31B) | 0.8600   | C(31)-N(31)-H(31A)  | 119.9      |
| N(31)-H(31A) | 0.8599   | H(31B)-N(31)-H(31A) | 120.0      |
| N(32)-C(31)  | 1.317(3) | C(31)-N(32)-C(33)   | 115.76(18) |
| N(32)-C(33)  | 1.353(3) | C(33)-N(33)-H(34B)  | 120.0      |
| N(33)-C(33)  | 1.311(3) | C(33)-N(33)-H(33B)  | 120.0      |
| N(33)-H(34B) | 0.8600   | H(34B)-N(33)-H(33B) | 120.0      |
| N(33)-H(33B) | 0.8601   | C(35)-N(34)-C(33)   | 115.31(18) |
| N(34)-C(35)  | 1.325(3) | C(35)-N(35)-H(45A)  | 120.0      |
| N(34)-C(33)  | 1.355(3) | C(35)-N(35)-H(45B)  | 120.0      |
| N(35)-C(35)  | 1.317(2) | H(45A)-N(35)-H(45B) | 120.0      |
| N(35)-H(45A) | 0.8601   | C(35)-N(36)-C(31)   | 118.82(18) |
| N(35)-H(45B) | 0.8600   | C(35)-N(36)-H(36)   | 116.8      |
| N(36)-C(35)  | 1.359(3) | C(31)-N(36)-H(36)   | 124.2      |
| N(36)-C(31)  | 1.363(3) | N(32)-C(31)-N(31)   | 121.7(2)   |
| N(36)-H(36)  | 1.0469   | N(32)-C(31)-N(36)   | 122.01(19) |
| N(41)-C(41)  | 1.316(3) | N(31)-C(31)-N(36)   | 116.3(2)   |
| N(41)-H(41B) | 0.8601   | N(33)-C(33)-N(32)   | 116.77(19) |
| N(41)-H(41A) | 0.8599   | N(33)-C(33)-N(34)   | 117.29(19) |
| N(42)-C(41)  | 1.321(3) | N(32)-C(33)-N(34)   | 125.95(19) |
| N(42)-C(43)  | 1.358(3) | N(35)-C(35)-N(34)   | 120.90(19) |
| N(43)-C(43)  | 1.313(3) | N(35)-C(35)-N(36)   | 117.0(2)   |
| N(43)-H(43B) | 0.8601   | N(34)-C(35)-N(36)   | 122.15(19) |
| N(43)-H(43A) | 0.8601   | C(41)-N(41)-H(41B)  | 120.0      |
| N(44)-C(45)  | 1.324(3) | C(41)-N(41)-H(41A)  | 120.0      |
| N(44)-C(43)  | 1.353(3) | H(41B)-N(41)-H(41A) | 120.0      |
| N(45)-C(45)  | 1.314(3) | C(41)-N(42)-C(43)   | 115.49(18) |
| N(45)-H(26A) | 0.8601   | C(43)-N(43)-H(43B)  | 120.1      |
| N(45)-H(26B) | 0.8600   | C(43)-N(43)-H(43A)  | 120.0      |
| N(46)-C(41)  | 1.360(3) | H(43B)-N(43)-H(43A) | 120.0      |
| N(46)-C(45)  | 1.366(3) | C(45)-N(44)-C(43)   | 115.91(18) |
| N(46)-H(46)  | 1.0203   | C(45)-N(45)-H(26A)  | 119.9      |
| O(14)-C(14)  | 1.358(2) | C(45)-N(45)-H(26B)  | 120.1      |
| O(14)-H(14)  | 0.8973   | H(26A)-N(45)-H(26B) | 120.0      |
| O(17A)-C(17) | 1.261(3) | C(41)-N(46)-C(45)   | 118.97(18) |
| O(17B)-C(17) | 1.265(2) | C(41)-N(46)-H(46)   | 116.9      |
| C(11)-C(12)  | 1.387(3) | C(45)-N(46)-H(46)   | 124.1      |
| C(11)-C(16)  | 1.392(3) | N(41)-C(41)-N(42)   | 121.0(2)   |
| C(11)-C(17)  | 1.488(3) | N(41)-C(41)-N(46)   | 116.8(2)   |
| C(12)-C(13)  | 1.372(3) | N(42)-C(41)-N(46)   | 122.21(19) |
| C(12)-H(12)  | 0.9300   | N(43)-C(43)-N(44)   | 116.70(19) |
| C(13)-C(14)  | 1.383(3) | N(43)-C(43)-N(42)   | 117.51(19) |
| C(13)-H(13)  | 0.9300   | N(44)-C(43)-N(42)   | 125.78(19) |
| C(14)-C(15)  | 1.382(3) | N(45)-C(45)-N(44)   | 121.4(2)   |
| C(15)-C(16)  | 1.368(3) | N(45)-C(45)-N(46)   | 116.9(2)   |
| C(15)-H(15)  | 0.9300   | N(44)-C(45)-N(46)   | 121.63(19) |
| C(16)-H(16)  | 0.9300   | C(14)-O(14)-H(14)   | 108.9      |
| O(24)-C(24)  | 1.357(2) | C(12)-C(11)-C(16)   | 117.8(2)   |
| O(24)-H(24)  | 0.8743   | C(12)-C(11)-C(17)   | 120.20(19) |
| O(27A)-C(27) | 1.273(2) | C(16)-C(11)-C(17)   | 122.05(19) |
| O(27B)-C(27) | 1.256(3) | C(13)-C(12)-C(11)   | 121.4(2)   |
| C(21)-C(22)  | 1.391(3) | C(13)-C(12)-H(12)   | 119.3      |
| C(21)-C(26)  | 1.395(3) | C(11)-C(12)-H(12)   | 119.3      |
| C(21)-C(27)  | 1.479(3) | C(12)-C(13)-C(14)   | 120.0(2)   |
| C(22)-C(23)  | 1.366(3) | C(12)-C(13)-H(13)   | 120.0      |
| C(22)-H(22)  | 0.9300   | C(14)-C(13)-H(13)   | 120.0      |

|              |          |                     |            |
|--------------|----------|---------------------|------------|
| C(23)-C(24)  | 1.381(3) | O(14)-C(14)-C(15)   | 123.2(2)   |
| C(23)-H(23)  | 0.9300   | O(14)-C(14)-C(13)   | 117.3(2)   |
| C(24)-C(25)  | 1.385(3) | C(15)-C(14)-C(13)   | 119.5(2)   |
| C(25)-C(26)  | 1.363(3) | C(16)-C(15)-C(14)   | 120.2(2)   |
| C(25)-H(25)  | 0.9300   | C(16)-C(15)-H(15)   | 119.9      |
| C(26)-H(26)  | 0.9300   | C(14)-C(15)-H(15)   | 119.9      |
| O(91)-H(91A) | 0.9548   | C(15)-C(16)-C(11)   | 121.2(2)   |
| O(91)-H(91B) | 0.7620   | C(15)-C(16)-H(16)   | 119.4      |
| O(93)-H(93B) | 0.8408   | C(11)-C(16)-H(16)   | 119.4      |
| O(93)-H(93A) | 0.8678   | O(17A)-C(17)-O(17B) | 122.8(2)   |
| O(90)-H(92A) | 0.8459   | O(17A)-C(17)-C(11)  | 118.66(19) |
| O(90)-H(90A) | 0.8811   | O(17B)-C(17)-C(11)  | 118.5(2)   |
| O(92)-H(92B) | 0.8980   | C(24)-O(24)-H(24)   | 114.5      |
| O(92)-H(0AA) | 0.8507   | C(22)-C(21)-C(26)   | 117.6(2)   |
|              |          | C(22)-C(21)-C(27)   | 121.94(19) |
|              |          | C(26)-C(21)-C(27)   | 120.4(2)   |
|              |          | C(23)-C(22)-C(21)   | 121.3(2)   |
|              |          | C(23)-C(22)-H(22)   | 119.3      |
|              |          | C(21)-C(22)-H(22)   | 119.3      |
|              |          | C(22)-C(23)-C(24)   | 120.2(2)   |
|              |          | C(22)-C(23)-H(23)   | 119.9      |
|              |          | C(24)-C(23)-H(23)   | 119.9      |
|              |          | O(24)-C(24)-C(23)   | 123.2(2)   |
|              |          | O(24)-C(24)-C(25)   | 117.53(19) |
|              |          | C(23)-C(24)-C(25)   | 119.3(2)   |
|              |          | C(26)-C(25)-C(24)   | 120.3(2)   |
|              |          | C(26)-C(25)-H(25)   | 119.8      |
|              |          | C(24)-C(25)-H(25)   | 119.8      |
|              |          | C(25)-C(26)-C(21)   | 121.2(2)   |
|              |          | C(25)-C(26)-H(26)   | 119.4      |
|              |          | C(21)-C(26)-H(26)   | 119.4      |
|              |          | O(27B)-C(27)-O(27A) | 122.3(2)   |
|              |          | O(27B)-C(27)-C(21)  | 119.1(2)   |
|              |          | O(27A)-C(27)-C(21)  | 118.60(19) |
|              |          | H(91A)-O(91)-H(91B) | 107.7      |
|              |          | H(93B)-O(93)-H(93A) | 109.7      |
|              |          | H(92A)-O(90)-H(90A) | 99.8       |
|              |          | H(92B)-O(92)-H(0AA) | 107.1      |

Symmetry transformations used to generate equivalent atoms:

Table 4. Anisotropic displacement parameters ( $\text{\AA}^2 \times 10^3$ ) for **3**. The anisotropic displacement factor exponent takes the form:  $-2\pi^2 [ h^2 a^{*2}U^{11} + \dots + 2 h k a^* b^* U^{12} ]$

|       | $U^{11}$ | $U^{22}$ | $U^{33}$ | $U^{23}$ | $U^{13}$ | $U^{12}$ |
|-------|----------|----------|----------|----------|----------|----------|
| N(31) | 55(1)    | 36(1)    | 33(1)    | -5(1)    | -4(1)    | 15(1)    |
| N(32) | 40(1)    | 27(1)    | 30(1)    | 0(1)     | -5(1)    | 2(1)     |
| N(33) | 71(2)    | 37(1)    | 28(1)    | -3(1)    | -9(1)    | 18(1)    |
| N(34) | 40(1)    | 28(1)    | 29(1)    | 0(1)     | -6(1)    | 2(1)     |
| N(35) | 49(1)    | 32(1)    | 32(1)    | -2(1)    | -7(1)    | 8(1)     |
| N(36) | 39(1)    | 29(1)    | 28(1)    | -2(1)    | -3(1)    | 4(1)     |
| C(31) | 32(1)    | 27(1)    | 34(1)    | 2(1)     | -5(1)    | -2(1)    |
| C(33) | 35(1)    | 26(1)    | 30(1)    | 2(1)     | -5(1)    | -2(1)    |
| C(35) | 31(1)    | 24(1)    | 34(1)    | 0(1)     | -5(1)    | -3(1)    |

|        |       |       |       |        |        |       |
|--------|-------|-------|-------|--------|--------|-------|
| N(41)  | 54(1) | 34(1) | 33(1) | -2(1)  | -6(1)  | 11(1) |
| N(42)  | 39(1) | 28(1) | 29(1) | -1(1)  | -4(1)  | 4(1)  |
| N(43)  | 63(1) | 37(1) | 27(1) | -2(1)  | -3(1)  | 17(1) |
| N(44)  | 40(1) | 28(1) | 29(1) | -2(1)  | -2(1)  | 2(1)  |
| N(45)  | 55(1) | 38(1) | 33(1) | -2(1)  | -10(1) | 16(1) |
| N(46)  | 42(1) | 32(1) | 27(1) | -3(1)  | -5(1)  | 6(1)  |
| C(41)  | 31(1) | 24(1) | 34(1) | -2(1)  | -5(1)  | -2(1) |
| C(43)  | 34(1) | 28(1) | 30(1) | 0(1)   | -4(1)  | -1(1) |
| C(45)  | 33(1) | 25(1) | 35(1) | -3(1)  | -4(1)  | 0(1)  |
| O(14)  | 98(2) | 49(1) | 32(1) | -5(1)  | -15(1) | 25(1) |
| O(17A) | 75(1) | 37(1) | 33(1) | -1(1)  | -13(1) | 10(1) |
| O(17B) | 68(1) | 36(1) | 38(1) | -10(1) | -10(1) | 10(1) |
| C(11)  | 33(1) | 30(1) | 32(1) | -2(1)  | -3(1)  | 2(1)  |
| C(12)  | 49(2) | 30(1) | 34(1) | -5(1)  | -6(1)  | 10(1) |
| C(13)  | 61(2) | 34(1) | 38(2) | 2(1)   | -11(1) | 15(1) |
| C(14)  | 48(2) | 33(1) | 28(1) | -3(1)  | -4(1)  | 5(1)  |
| C(15)  | 47(2) | 29(1) | 36(2) | -5(1)  | 0(1)   | 8(1)  |
| C(16)  | 41(1) | 28(1) | 36(1) | 2(1)   | -5(1)  | 7(1)  |
| C(17)  | 40(2) | 32(1) | 35(1) | -4(1)  | -6(1)  | 4(1)  |
| O(24)  | 92(1) | 46(1) | 29(1) | -2(1)  | -8(1)  | 20(1) |
| O(27A) | 72(1) | 37(1) | 34(1) | 4(1)   | -9(1)  | 9(1)  |
| O(27B) | 82(1) | 34(1) | 33(1) | -4(1)  | -6(1)  | 9(1)  |
| C(21)  | 33(1) | 30(1) | 31(1) | -2(1)  | -3(1)  | -1(1) |
| C(22)  | 39(1) | 27(1) | 35(1) | -6(1)  | -2(1)  | 4(1)  |
| C(23)  | 44(2) | 28(1) | 36(2) | 1(1)   | -9(1)  | 6(1)  |
| C(24)  | 43(2) | 31(1) | 32(1) | -1(1)  | -7(1)  | 3(1)  |
| C(25)  | 55(2) | 31(1) | 37(2) | -7(1)  | 0(1)   | 10(1) |
| C(26)  | 52(2) | 28(1) | 32(1) | 1(1)   | -5(1)  | 9(1)  |
| C(27)  | 40(2) | 35(1) | 35(1) | -1(1)  | -3(1)  | 0(1)  |
| O(91)  | 85(1) | 46(1) | 47(1) | -10(1) | 8(1)   | -2(1) |
| O(93)  | 60(1) | 40(1) | 48(1) | -7(1)  | -5(1)  | 4(1)  |
| O(90)  | 87(1) | 45(1) | 46(1) | 5(1)   | -22(1) | -3(1) |
| O(92)  | 59(1) | 39(1) | 48(1) | 1(1)   | -7(1)  | 5(1)  |

Table 5. Hydrogen coordinates ( $\times 10^4$ ) and isotropic displacement parameters ( $\text{\AA}^2 \times 10^{-3}$ ) for **3**.

|        | x     | y    | z     | U(eq) |
|--------|-------|------|-------|-------|
| H(31B) | 2842  | 4752 | 723   | 52    |
| H(31A) | 3495  | 4082 | 1474  | 52    |
| H(34B) | 4552  | 2898 | -1718 | 57    |
| H(33B) | 5714  | 1682 | -1734 | 57    |
| H(45A) | 7574  | -226 | 672   | 46    |
| H(45B) | 6961  | 418  | 1440  | 46    |
| H(36)  | 5202  | 2168 | 1559  | 39    |
| H(41B) | 7386  | 5207 | 816   | 49    |
| H(41A) | 7948  | 4553 | 1587  | 49    |
| H(43B) | 10507 | 2080 | -1569 | 53    |
| H(43A) | 9353  | 3298 | -1591 | 53    |
| H(26A) | 12082 | 215  | 883   | 53    |
| H(26B) | 11383 | 866  | 1639  | 53    |
| H(46)  | 9585  | 2758 | 1700  | 41    |
| H(14)  | 9535  | 3351 | 6638  | 93    |
| H(12)  | 11297 | 626  | 4247  | 46    |

|        |       |       |       |    |
|--------|-------|-------|-------|----|
| H(13)  | 11356 | 829   | 5623  | 55 |
| H(15)  | 8769  | 4271  | 5410  | 46 |
| H(16)  | 8729  | 4068  | 4036  | 43 |
| H(24)  | 5499  | 1694  | 6539  | 87 |
| H(22)  | 6184  | 911   | 3890  | 41 |
| H(23)  | 6269  | 739   | 5275  | 44 |
| H(25)  | 3760  | 4201  | 5448  | 51 |
| H(26)  | 3721  | 4387  | 4063  | 46 |
| H(91A) | 4253  | 4834  | -2641 | 91 |
| H(91B) | 3628  | 3811  | -2944 | 91 |
| H(93B) | 375   | 4824  | 2692  | 75 |
| H(93A) | 2180  | 4956  | 2722  | 75 |
| H(92A) | 8443  | -1270 | 2847  | 89 |
| H(90A) | 8865  | -149  | 2636  | 89 |
| H(92B) | 2616  | 35    | 2872  | 74 |
| H(0AA) | 4448  | 157   | 2764  | 74 |

### Crystallographic Information of 4

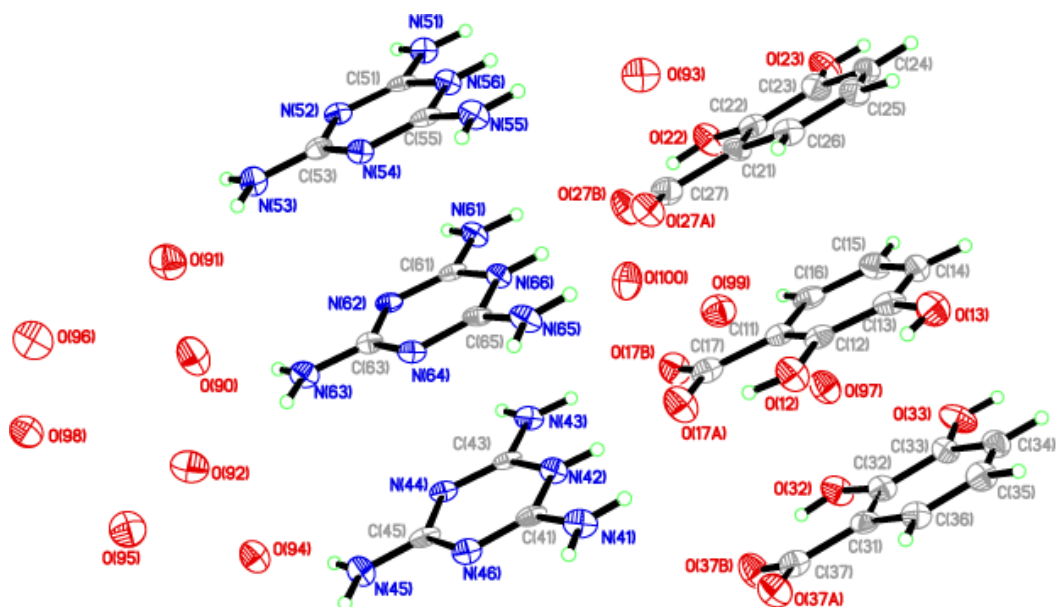

**Figure 3.** ORTEP drawing of the asymmetric unit of the complex 4.

Table 1. Crystal data and structure refinement for 4.

|                     |                                                                 |
|---------------------|-----------------------------------------------------------------|
| Identification code | 4                                                               |
| Empirical formula   | C <sub>30</sub> H <sub>36</sub> N <sub>18</sub> O <sub>23</sub> |
| Formula weight      | 1016.77                                                         |
| Temperature         | 150(2) K                                                        |
| Wavelength          | 0.71073 Å                                                       |
| Crystal system      | Triclinic                                                       |
| Space group         | <i>P</i> $\bar{1}$                                              |

|                                   |                                                                                                 |                                                                                       |
|-----------------------------------|-------------------------------------------------------------------------------------------------|---------------------------------------------------------------------------------------|
| Unit cell dimensions              | $a = 10.8110(10) \text{ \AA}$<br>$b = 12.2980(10) \text{ \AA}$<br>$c = 19.5800(10) \text{ \AA}$ | $\alpha = 82.230(4)^\circ$<br>$\beta = 79.120(5)^\circ$<br>$\gamma = 64.530(5)^\circ$ |
| Volume                            | 2303.7(3) $\text{\AA}^3$                                                                        |                                                                                       |
| Z                                 | 2                                                                                               |                                                                                       |
| Density (calculated)              | 1.466 Mg/m <sup>3</sup>                                                                         |                                                                                       |
| Absorption coefficient            | 0.127 mm <sup>-1</sup>                                                                          |                                                                                       |
| $F(000)$                          | 1052                                                                                            |                                                                                       |
| Crystal size                      | 0.18 x 0.15 x 0.11 mm <sup>3</sup>                                                              |                                                                                       |
| Theta range for data collection   | 2.15 to 25.24°.                                                                                 |                                                                                       |
| Index ranges                      | -12 ≤ h ≤ 12, -14 ≤ k ≤ 14, -23 ≤ l ≤ 23                                                        |                                                                                       |
| Reflections collected             | 43060                                                                                           |                                                                                       |
| Independent reflections           | 8323 [R(int) = 0.0794]                                                                          |                                                                                       |
| Completeness to theta = 25.24°    | 99.9 %                                                                                          |                                                                                       |
| Absorption correction             | Semi-empirical from equivalents                                                                 |                                                                                       |
| Max. and min. transmission        | 0.9861 and 0.9774                                                                               |                                                                                       |
| Refinement method                 | Full-matrix least-squares on F <sup>2</sup>                                                     |                                                                                       |
| Data / restraints / parameters    | 8323 / 569 / 640                                                                                |                                                                                       |
| Goodness-of-fit on F <sup>2</sup> | 1.112                                                                                           |                                                                                       |
| Final R indices [I > 2σ(I)]       | R1 = 0.0797, wR2 = 0.2058                                                                       |                                                                                       |
| R indices (all data)              | R1 = 0.1432, wR2 = 0.2257                                                                       |                                                                                       |
| Largest diff. peak and hole       | 0.536 and -0.364 e.Å <sup>-3</sup>                                                              |                                                                                       |

Table 2. Atomic coordinates (x 10<sup>4</sup>) and equivalent isotropic displacement parameters (Å<sup>2</sup>x 10<sup>3</sup>) for **4**.  
 U(eq) is defined as one third of the trace of the orthogonalized U<sup>ij</sup> tensor.

|        | x       | y       | z       | U(eq) |
|--------|---------|---------|---------|-------|
| O(22)  | 6799(3) | 3890(3) | 1680(2) | 32(1) |
| O(23)  | 7804(3) | 3948(3) | 353(2)  | 34(1) |
| O(27A) | 6296(3) | 2669(3) | 2779(2) | 33(1) |
| O(27B) | 7054(3) | 681(3)  | 2785(2) | 30(1) |
| C(21)  | 7438(4) | 1742(4) | 1710(2) | 21(1) |
| C(22)  | 7371(4) | 2820(4) | 1364(2) | 23(1) |
| C(23)  | 7902(5) | 2851(4) | 658(2)  | 26(1) |
| C(24)  | 8496(4) | 1805(4) | 306(2)  | 25(1) |
| C(25)  | 8564(4) | 710(4)  | 651(2)  | 27(1) |
| C(26)  | 8054(4) | 678(4)  | 1344(2) | 24(1) |
| C(27)  | 6897(5) | 1691(4) | 2463(2) | 28(1) |
| O(32)  | 176(3)  | 4147(3) | 1495(2) | 32(1) |
| O(33)  | 1234(3) | 4063(3) | 138(2)  | 36(1) |

|        |         |         |         |       |
|--------|---------|---------|---------|-------|
| O(37A) | -393(3) | 3012(3) | 2635(2) | 36(1) |
| O(37B) | 409(3)  | 1019(3) | 2703(2) | 34(1) |
| C(31)  | 784(4)  | 2000(4) | 1600(2) | 23(1) |
| C(32)  | 725(4)  | 3067(4) | 1204(2) | 23(1) |
| C(33)  | 1274(4) | 3014(4) | 510(2)  | 22(1) |
| C(34)  | 1868(5) | 1929(4) | 197(2)  | 27(1) |
| C(35)  | 1940(5) | 876(4)  | 587(2)  | 28(1) |
| C(36)  | 1412(4) | 908(4)  | 1267(2) | 24(1) |
| C(37)  | 229(5)  | 2007(4) | 2353(2) | 26(1) |
| N(51)  | 8736(3) | 4508(3) | 4052(2) | 21(1) |
| N(52)  | 8118(3) | 3604(3) | 5087(2) | 19(1) |
| N(53)  | 7499(4) | 2627(3) | 6077(2) | 23(1) |
| N(54)  | 8184(3) | 1622(3) | 5072(2) | 19(1) |
| N(55)  | 8921(4) | 712(3)  | 4028(2) | 24(1) |
| N(56)  | 8811(3) | 2609(3) | 4044(2) | 20(1) |
| C(51)  | 8533(4) | 3586(4) | 4409(2) | 18(1) |
| C(53)  | 7930(4) | 2626(4) | 5398(2) | 19(1) |
| C(55)  | 8622(4) | 1642(3) | 4399(2) | 17(1) |
| N(61)  | 5385(3) | 4409(3) | 4133(2) | 21(1) |
| N(62)  | 4742(3) | 3553(3) | 5174(2) | 18(1) |
| N(63)  | 4121(4) | 2610(3) | 6175(2) | 23(1) |
| N(64)  | 4778(3) | 1576(3) | 5182(2) | 18(1) |
| N(65)  | 5544(3) | 630(3)  | 4147(2) | 23(1) |
| N(66)  | 5440(3) | 2528(3) | 4144(2) | 18(1) |
| C(61)  | 5168(4) | 3503(4) | 4500(2) | 17(1) |
| C(63)  | 4544(4) | 2571(3) | 5498(2) | 17(1) |
| C(65)  | 5242(4) | 1568(4) | 4502(2) | 18(1) |
| N(41)  | 2169(4) | 542(3)  | 4245(2) | 25(1) |
| N(42)  | 2058(4) | 2452(3) | 4214(2) | 21(1) |
| N(43)  | 2043(3) | 4327(3) | 4176(2) | 22(1) |
| N(44)  | 1365(3) | 3513(3) | 5228(2) | 18(1) |
| N(45)  | 667(4)  | 2615(3) | 6229(2) | 24(1) |
| N(46)  | 1388(4) | 1533(3) | 5258(2) | 20(1) |
| C(41)  | 1858(4) | 1509(4) | 4593(2) | 20(1) |
| C(43)  | 1805(4) | 3445(3) | 4554(2) | 18(1) |
| C(45)  | 1148(4) | 2548(3) | 5562(2) | 18(1) |
| O(12)  | 4145(3) | 579(3)  | 1998(2) | 33(1) |
| O(13)  | 5178(3) | 68(3)   | 671(2)  | 34(1) |
| O(17A) | 3106(3) | 2079(3) | 2909(2) | 38(1) |
| O(17B) | 2764(3) | 4012(3) | 2678(2) | 33(1) |
| C(11)  | 3801(4) | 2657(4) | 1751(2) | 23(1) |
| C(12)  | 4251(4) | 1491(4) | 1545(2) | 22(1) |
| C(13)  | 4793(4) | 1230(4) | 861(2)  | 25(1) |
| C(14)  | 4916(5) | 2105(4) | 379(2)  | 28(1) |
| C(15)  | 4494(5) | 3285(4) | 579(2)  | 29(1) |
| C(16)  | 3956(4) | 3534(4) | 1257(2) | 25(1) |
| C(17)  | 3195(5) | 2942(4) | 2488(2) | 28(1) |
| O(94)  | 108(3)  | 4474(3) | 7163(2) | 32(1) |
| O(95)  | 1624(3) | 3065(3) | 8211(2) | 42(1) |
| O(97)  | 1007(4) | 6169(3) | 1039(2) | 39(1) |
| O(96)  | 5603(4) | 1829(3) | 8462(2) | 42(1) |
| O(99)  | 2035(4) | 7511(3) | 1713(2) | 46(1) |
| O(92)  | 3540(3) | 1162(3) | 7433(2) | 34(1) |
| O(91)  | 7081(3) | 789(3)  | 7053(2) | 38(1) |
| O(90)  | 3804(4) | 4448(3) | 7138(2) | 45(1) |
| O(100) | 3585(4) | 5831(3) | 2700(2) | 45(1) |
| O(93)  | 9868(3) | -945(3) | 2648(2) | 33(1) |
| O(98)  | 3116(3) | 3845(3) | 8884(2) | 35(1) |

Table 3. Bond lengths [Å] and angles [°] for **4**.

|              |          |                     |          |
|--------------|----------|---------------------|----------|
| O(22)-C(22)  | 1.369(5) | C(22)-C(21)-C(26)   | 119.4(4) |
| O(23)-C(23)  | 1.368(5) | C(22)-C(21)-C(27)   | 120.7(4) |
| O(27A)-C(27) | 1.277(5) | C(26)-C(21)-C(27)   | 119.9(4) |
| O(27B)-C(27) | 1.271(5) | O(22)-C(22)-C(21)   | 123.2(4) |
| C(21)-C(22)  | 1.384(6) | O(22)-C(22)-C(23)   | 116.7(4) |
| C(21)-C(26)  | 1.413(6) | C(21)-C(22)-C(23)   | 120.1(4) |
| C(21)-C(27)  | 1.483(6) | O(23)-C(23)-C(24)   | 123.5(4) |
| C(22)-C(23)  | 1.395(6) | O(23)-C(23)-C(22)   | 116.6(4) |
| C(23)-C(24)  | 1.381(6) | C(24)-C(23)-C(22)   | 119.9(4) |
| C(24)-C(25)  | 1.401(6) | C(23)-C(24)-C(25)   | 120.5(4) |
| C(25)-C(26)  | 1.366(6) | C(26)-C(25)-C(24)   | 119.6(4) |
| O(32)-C(32)  | 1.356(5) | C(25)-C(26)-C(21)   | 120.5(4) |
| O(33)-C(33)  | 1.381(5) | O(27B)-C(27)-O(27A) | 121.1(4) |
| O(37A)-C(37) | 1.271(5) | O(27B)-C(27)-C(21)  | 119.9(4) |
| O(37B)-C(37) | 1.267(5) | O(27A)-C(27)-C(21)  | 118.9(4) |
| C(31)-C(36)  | 1.406(6) | C(36)-C(31)-C(32)   | 118.4(4) |
| C(31)-C(32)  | 1.413(6) | C(36)-C(31)-C(37)   | 119.9(4) |
| C(31)-C(37)  | 1.483(6) | C(32)-C(31)-C(37)   | 121.7(4) |
| C(32)-C(33)  | 1.375(6) | O(32)-C(32)-C(33)   | 118.5(4) |
| C(33)-C(34)  | 1.381(6) | O(32)-C(32)-C(31)   | 121.8(4) |
| C(34)-C(35)  | 1.391(6) | C(33)-C(32)-C(31)   | 119.7(4) |
| C(35)-C(36)  | 1.344(6) | C(32)-C(33)-C(34)   | 120.4(4) |
| N(51)-C(51)  | 1.329(5) | C(32)-C(33)-O(33)   | 118.7(4) |
| N(52)-C(51)  | 1.318(5) | C(34)-C(33)-O(33)   | 120.9(4) |
| N(52)-C(53)  | 1.350(5) | C(33)-C(34)-C(35)   | 120.0(4) |
| N(53)-C(53)  | 1.324(5) | C(36)-C(35)-C(34)   | 120.5(4) |
| N(54)-C(55)  | 1.315(5) | C(35)-C(36)-C(31)   | 120.9(4) |
| N(54)-C(53)  | 1.365(5) | O(37B)-C(37)-O(37A) | 121.5(4) |
| N(55)-C(55)  | 1.325(5) | O(37B)-C(37)-C(31)  | 119.8(4) |
| N(56)-C(55)  | 1.368(5) | O(37A)-C(37)-C(31)  | 118.7(4) |
| N(56)-C(51)  | 1.373(5) | C(51)-N(52)-C(53)   | 116.2(4) |
| N(61)-C(61)  | 1.326(5) | C(55)-N(54)-C(53)   | 115.9(3) |
| N(62)-C(61)  | 1.313(5) | C(55)-N(56)-C(51)   | 118.3(4) |
| N(62)-C(63)  | 1.368(5) | N(52)-C(51)-N(51)   | 121.0(4) |
| N(63)-C(63)  | 1.318(5) | N(52)-C(51)-N(56)   | 122.0(4) |
| N(64)-C(65)  | 1.330(5) | N(51)-C(51)-N(56)   | 117.0(4) |
| N(64)-C(63)  | 1.352(5) | N(53)-C(53)-N(52)   | 117.4(4) |
| N(65)-C(65)  | 1.315(5) | N(53)-C(53)-N(54)   | 117.2(4) |
| N(66)-C(61)  | 1.362(5) | N(52)-C(53)-N(54)   | 125.3(4) |
| N(66)-C(65)  | 1.366(5) | N(54)-C(55)-N(55)   | 121.4(4) |
| N(41)-C(41)  | 1.335(5) | N(54)-C(55)-N(56)   | 122.2(4) |
| N(42)-C(41)  | 1.366(5) | N(55)-C(55)-N(56)   | 116.4(4) |
| N(42)-C(43)  | 1.368(5) | C(61)-N(62)-C(63)   | 115.7(4) |
| N(43)-C(43)  | 1.319(5) | C(65)-N(64)-C(63)   | 116.3(3) |
| N(44)-C(43)  | 1.317(5) | C(61)-N(66)-C(65)   | 118.6(4) |
| N(44)-C(45)  | 1.364(5) | N(62)-C(61)-N(61)   | 120.7(4) |
| N(45)-C(45)  | 1.312(5) | N(62)-C(61)-N(66)   | 122.8(4) |
| N(46)-C(41)  | 1.303(5) | N(61)-C(61)-N(66)   | 116.4(4) |
| N(46)-C(45)  | 1.358(5) | N(63)-C(63)-N(64)   | 118.7(4) |
| O(12)-C(12)  | 1.364(5) | N(63)-C(63)-N(62)   | 116.2(4) |
| O(13)-C(13)  | 1.388(5) | N(64)-C(63)-N(62)   | 125.1(4) |
| O(17A)-C(17) | 1.279(5) | N(65)-C(65)-N(64)   | 121.3(4) |
| O(17B)-C(17) | 1.275(5) | N(65)-C(65)-N(66)   | 117.1(4) |
| C(11)-C(16)  | 1.393(6) | N(64)-C(65)-N(66)   | 121.5(4) |
| C(11)-C(12)  | 1.393(6) | C(41)-N(42)-C(43)   | 118.3(4) |
| C(11)-C(17)  | 1.489(6) | C(43)-N(44)-C(45)   | 116.0(4) |
| C(12)-C(13)  | 1.377(6) | C(41)-N(46)-C(45)   | 115.7(4) |



|             |          |                     |          |
|-------------|----------|---------------------|----------|
| C(13)-C(14) | 1.367(6) | N(46)-C(41)-N(41)   | 120.9(4) |
| C(14)-C(15) | 1.408(6) | N(46)-C(41)-N(42)   | 122.9(4) |
| C(15)-C(16) | 1.364(6) | N(41)-C(41)-N(42)   | 116.2(4) |
|             |          | N(44)-C(43)-N(43)   | 121.4(4) |
|             |          | N(44)-C(43)-N(42)   | 121.8(4) |
|             |          | N(43)-C(43)-N(42)   | 116.9(4) |
|             |          | N(45)-C(45)-N(46)   | 117.9(4) |
|             |          | N(45)-C(45)-N(44)   | 116.9(4) |
|             |          | N(46)-C(45)-N(44)   | 125.2(4) |
|             |          | C(16)-C(11)-C(12)   | 118.5(4) |
|             |          | C(16)-C(11)-C(17)   | 121.3(4) |
|             |          | C(12)-C(11)-C(17)   | 120.2(4) |
|             |          | O(12)-C(12)-C(13)   | 117.6(4) |
|             |          | O(12)-C(12)-C(11)   | 122.1(4) |
|             |          | C(13)-C(12)-C(11)   | 120.3(4) |
|             |          | C(14)-C(13)-C(12)   | 120.6(4) |
|             |          | C(14)-C(13)-O(13)   | 121.0(4) |
|             |          | C(12)-C(13)-O(13)   | 118.4(4) |
|             |          | C(13)-C(14)-C(15)   | 120.1(4) |
|             |          | C(16)-C(15)-C(14)   | 118.9(4) |
|             |          | C(15)-C(16)-C(11)   | 121.7(4) |
|             |          | O(17B)-C(17)-O(17A) | 122.3(4) |
|             |          | O(17B)-C(17)-C(11)  | 120.5(4) |
|             |          | O(17A)-C(17)-C(11)  | 117.2(4) |

Symmetry transformations used to generate equivalent atoms:

Table 4. Anisotropic displacement parameters ( $\text{\AA}^2 \times 10^3$ ) for **4**. The anisotropic displacement factor exponent takes the form:  $-2\pi^2 [ h^2 a^{*2}U^{11} + \dots + 2 h k a^* b^* U^{12} ]$

|        | U <sup>11</sup> | U <sup>22</sup> | U <sup>33</sup> | U <sup>23</sup> | U <sup>13</sup> | U <sup>12</sup> |
|--------|-----------------|-----------------|-----------------|-----------------|-----------------|-----------------|
| O(22)  | 38(2)           | 21(2)           | 31(2)           | -5(1)           | 5(2)            | -10(2)          |
| O(23)  | 40(2)           | 26(2)           | 31(2)           | -2(2)           | 7(2)            | -13(2)          |
| O(27A) | 41(2)           | 24(2)           | 27(2)           | -9(1)           | 5(2)            | -11(2)          |
| O(27B) | 36(2)           | 23(2)           | 31(2)           | -3(1)           | 2(2)            | -13(2)          |
| C(21)  | 15(2)           | 19(2)           | 26(2)           | -6(2)           | 3(2)            | -5(2)           |
| C(22)  | 18(3)           | 19(2)           | 33(3)           | -4(2)           | -5(2)           | -7(2)           |
| C(23)  | 22(3)           | 21(2)           | 29(3)           | -1(2)           | -2(2)           | -5(2)           |
| C(24)  | 17(3)           | 31(3)           | 23(2)           | -4(2)           | -1(2)           | -6(2)           |
| C(25)  | 17(3)           | 25(3)           | 30(3)           | -6(2)           | -1(2)           | -1(2)           |
| C(26)  | 20(3)           | 16(2)           | 32(3)           | 1(2)            | -5(2)           | -5(2)           |
| C(27)  | 26(3)           | 25(3)           | 33(3)           | -2(2)           | -3(2)           | -12(2)          |
| O(32)  | 31(2)           | 20(2)           | 38(2)           | -9(2)           | 6(2)            | -7(2)           |
| O(33)  | 30(2)           | 28(2)           | 40(2)           | 6(2)            | 6(2)            | -9(2)           |
| O(37A) | 45(2)           | 30(2)           | 31(2)           | -7(2)           | 4(2)            | -14(2)          |
| O(37B) | 37(2)           | 28(2)           | 34(2)           | 2(2)            | -2(2)           | -13(2)          |
| C(31)  | 12(2)           | 25(2)           | 28(2)           | -1(2)           | -6(2)           | -5(2)           |
| C(32)  | 14(2)           | 15(2)           | 33(3)           | -7(2)           | -1(2)           | 2(2)            |
| C(33)  | 20(3)           | 18(2)           | 23(2)           | 2(2)            | -3(2)           | -4(2)           |
| C(34)  | 22(3)           | 31(3)           | 26(3)           | -2(2)           | -2(2)           | -8(2)           |
| C(35)  | 22(3)           | 21(2)           | 35(3)           | -6(2)           | -3(2)           | -4(2)           |
| C(36)  | 21(3)           | 19(2)           | 30(3)           | -1(2)           | -3(2)           | -6(2)           |
| C(37)  | 22(3)           | 17(2)           | 38(3)           | -7(2)           | -3(2)           | -7(2)           |
| N(51)  | 23(2)           | 12(2)           | 28(2)           | -3(2)           | -3(2)           | -6(2)           |
| N(52)  | 14(2)           | 12(2)           | 28(2)           | -3(2)           | -3(2)           | -4(2)           |
| N(53)  | 32(2)           | 15(2)           | 26(2)           | -1(2)           | -4(2)           | -14(2)          |

|        |       |       |       |       |        |        |
|--------|-------|-------|-------|-------|--------|--------|
| N(54)  | 19(2) | 14(2) | 23(2) | -3(2) | -1(2)  | -8(2)  |
| N(55)  | 29(2) | 16(2) | 29(2) | -6(2) | 2(2)   | -11(2) |
| N(56)  | 23(2) | 13(2) | 25(2) | -7(2) | 2(2)   | -9(2)  |
| C(51)  | 7(2)  | 11(2) | 34(3) | -4(2) | -4(2)  | -2(2)  |
| C(53)  | 14(2) | 13(2) | 27(2) | 0(2)  | -6(2)  | -3(2)  |
| C(55)  | 11(2) | 7(2)  | 34(3) | -2(2) | -5(2)  | -4(2)  |
| N(61)  | 22(2) | 13(2) | 24(2) | -4(2) | 3(2)   | -6(2)  |
| N(62)  | 12(2) | 14(2) | 26(2) | -2(2) | -2(2)  | -4(2)  |
| N(63)  | 29(2) | 16(2) | 28(2) | -4(2) | 0(2)   | -14(2) |
| N(64)  | 16(2) | 13(2) | 26(2) | -4(2) | 0(2)   | -6(2)  |
| N(65)  | 25(2) | 12(2) | 28(2) | -2(2) | 4(2)   | -8(2)  |
| N(66)  | 21(2) | 13(2) | 21(2) | -2(2) | 0(2)   | -9(2)  |
| C(61)  | 10(2) | 12(2) | 29(3) | -1(2) | -6(2)  | -4(2)  |
| C(63)  | 13(2) | 10(2) | 25(2) | 2(2)  | -5(2)  | -2(2)  |
| C(65)  | 11(2) | 12(2) | 29(3) | -1(2) | -1(2)  | -4(2)  |
| N(41)  | 24(2) | 13(2) | 36(2) | -5(2) | 1(2)   | -6(2)  |
| N(42)  | 23(2) | 13(2) | 26(2) | -4(2) | 0(2)   | -8(2)  |
| N(43)  | 21(2) | 13(2) | 31(2) | -8(2) | 3(2)   | -7(2)  |
| N(44)  | 14(2) | 12(2) | 29(2) | -5(2) | -2(2)  | -4(2)  |
| N(45)  | 39(2) | 15(2) | 24(2) | -5(2) | 1(2)   | -17(2) |
| N(46)  | 20(2) | 12(2) | 29(2) | -4(2) | -3(2)  | -5(2)  |
| C(41)  | 10(2) | 13(2) | 35(3) | -5(2) | -4(2)  | -2(2)  |
| C(43)  | 10(2) | 10(2) | 33(3) | -4(2) | -4(2)  | -4(2)  |
| C(45)  | 9(2)  | 6(2)  | 37(3) | -3(2) | -6(2)  | 1(2)   |
| O(12)  | 38(2) | 26(2) | 31(2) | -3(2) | 0(2)   | -12(2) |
| O(13)  | 32(2) | 29(2) | 36(2) | -5(2) | -2(2)  | -8(2)  |
| O(17A) | 47(2) | 29(2) | 34(2) | -5(2) | 4(2)   | -16(2) |
| O(17B) | 36(2) | 24(2) | 36(2) | -9(2) | 1(2)   | -11(2) |
| C(11)  | 18(3) | 25(2) | 30(2) | -2(2) | -5(2)  | -11(2) |
| C(12)  | 20(3) | 20(2) | 30(2) | 3(2)  | -8(2)  | -10(2) |
| C(13)  | 18(3) | 18(2) | 39(3) | -2(2) | -4(2)  | -8(2)  |
| C(14)  | 25(3) | 39(3) | 21(2) | -3(2) | -2(2)  | -13(2) |
| C(15)  | 26(3) | 23(3) | 36(3) | -3(2) | 0(2)   | -12(2) |
| C(16)  | 19(3) | 16(2) | 41(3) | 1(2)  | -8(2)  | -8(2)  |
| C(17)  | 21(3) | 25(3) | 40(3) | -5(2) | -6(2)  | -10(2) |
| O(94)  | 41(2) | 24(2) | 30(2) | -7(1) | 2(2)   | -14(2) |
| O(95)  | 34(2) | 35(2) | 45(2) | -6(2) | -3(2)  | -5(2)  |
| O(97)  | 48(2) | 33(2) | 35(2) | -3(2) | 2(2)   | -18(2) |
| O(96)  | 46(2) | 27(2) | 49(2) | -5(2) | -2(2)  | -13(2) |
| O(99)  | 37(2) | 41(2) | 53(2) | -6(2) | -5(2)  | -10(2) |
| O(92)  | 33(2) | 24(2) | 44(2) | 1(2)  | -2(2)  | -12(2) |
| O(91)  | 44(2) | 33(2) | 39(2) | 4(2)  | -5(2)  | -21(2) |
| O(90)  | 69(3) | 42(2) | 34(2) | -6(2) | 2(2)   | -34(2) |
| O(100) | 56(3) | 42(2) | 40(2) | -9(2) | -11(2) | -20(2) |
| O(93)  | 32(2) | 25(2) | 41(2) | -2(2) | -4(2)  | -11(2) |
| O(98)  | 34(2) | 30(2) | 36(2) | -6(2) | 1(2)   | -11(2) |

Table 5. Hydrogen coordinates ( $\times 10^4$ ) and isotropic displacement parameters ( $\text{\AA}^2 \times 10^{-3}$ ) for **4**.

|        | x    | y    | z    | U(eq) |
|--------|------|------|------|-------|
| H(22)  | 6501 | 3778 | 2100 | 47    |
| H(23)  | 8155 | 3873 | -68  | 52    |
| H(24A) | 8861 | 1827 | -174 | 30    |

|        |      |      |      |    |
|--------|------|------|------|----|
| H(25A) | 8962 | -6   | 405  | 32 |
| H(26A) | 8114 | -66  | 1581 | 29 |
| H(32)  | -124 | 4062 | 1918 | 48 |
| H(33)  | 1611 | 3910 | -275 | 54 |
| H(34A) | 2227 | 1901 | -285 | 33 |
| H(35A) | 2365 | 129  | 371  | 33 |
| H(36A) | 1465 | 182  | 1526 | 29 |
| H(51A) | 8593 | 5144 | 4268 | 25 |
| H(51B) | 9013 | 4484 | 3600 | 25 |
| H(53A) | 7346 | 3250 | 6308 | 27 |
| H(53B) | 7365 | 2005 | 6298 | 27 |
| H(55A) | 8828 | 63   | 4233 | 29 |
| H(55B) | 9213 | 743  | 3578 | 29 |
| H(56)  | 9103 | 2606 | 3592 | 24 |
| H(61A) | 5244 | 5052 | 4340 | 25 |
| H(61B) | 5670 | 4366 | 3681 | 25 |
| H(63A) | 3996 | 1995 | 6412 | 27 |
| H(63B) | 3963 | 3251 | 6390 | 27 |
| H(65A) | 5440 | -10  | 4359 | 27 |
| H(65B) | 5850 | 642  | 3698 | 27 |
| H(66)  | 5736 | 2517 | 3694 | 22 |
| H(41A) | 2056 | -91  | 4464 | 30 |
| H(41B) | 2485 | 537  | 3797 | 30 |
| H(42)  | 2342 | 2422 | 3762 | 25 |
| H(43A) | 1909 | 4977 | 4374 | 26 |
| H(43B) | 2337 | 4264 | 3726 | 26 |
| H(45A) | 510  | 2014 | 6465 | 29 |
| H(45B) | 501  | 3262 | 6441 | 29 |
| H(12)  | 3802 | 838  | 2397 | 49 |
| H(13)  | 5036 | -359 | 1024 | 51 |
| H(14A) | 5286 | 1917 | -92  | 34 |
| H(15A) | 4583 | 3896 | 247  | 34 |
| H(16A) | 3679 | 4326 | 1395 | 30 |

#### Crystallographic Information of 5

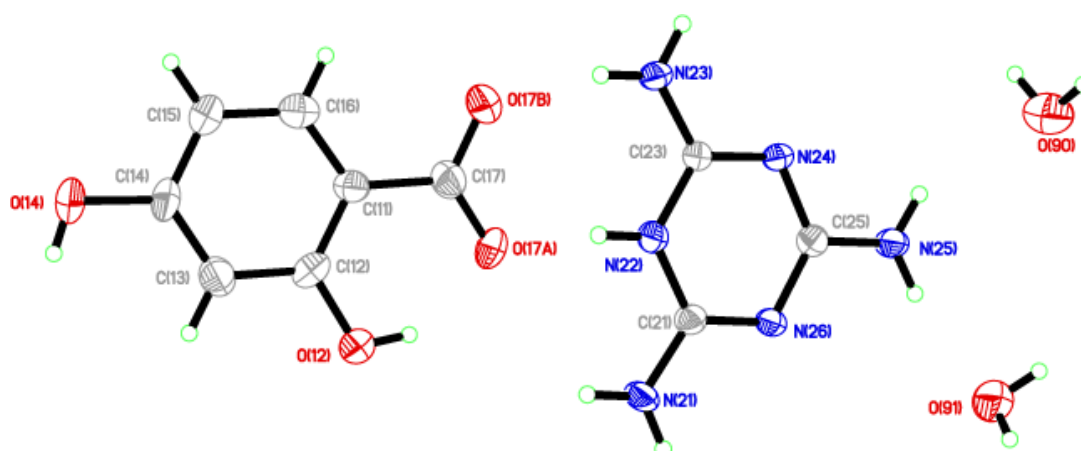

Figure 4. ORTEP drawing of the asymmetric unit of the complex 5.

Table 1. Crystal data and structure refinement for **5**.

|                                    |                                                               |                        |
|------------------------------------|---------------------------------------------------------------|------------------------|
| Identification code                | <b>5</b>                                                      |                        |
| Empirical formula                  | C <sub>10</sub> H <sub>16</sub> N <sub>6</sub> O <sub>6</sub> |                        |
| Formula weight                     | 316.29                                                        |                        |
| Temperature                        | 298(2) K                                                      |                        |
| Wavelength                         | 0.71073 Å                                                     |                        |
| Crystal system                     | Monoclinic                                                    |                        |
| Space group                        | <i>P</i> 2 <sub>1</sub> / <i>c</i>                            |                        |
| Unit cell dimensions               | <i>a</i> = 15.7880(10) Å                                      | <i>α</i> = 90°.        |
|                                    | <i>b</i> = 12.1600(10) Å                                      | <i>β</i> = 96.560(5)°. |
|                                    | <i>c</i> = 7.161 Å                                            | <i>γ</i> = 90°.        |
| Volume                             | 1365.78(14) Å <sup>3</sup>                                    |                        |
| <i>Z</i>                           | 4                                                             |                        |
| Density (calculated)               | 1.538 Mg/m <sup>3</sup>                                       |                        |
| Absorption coefficient             | 0.128 mm <sup>-1</sup>                                        |                        |
| F(000)                             | 664                                                           |                        |
| Crystal size                       | 0.14 x 0.13 x 0.08 mm <sup>3</sup>                            |                        |
| Theta range for data collection    | 2.12 to 25.10°.                                               |                        |
| Index ranges                       | -18 ≤ <i>h</i> ≤ 18, -14 ≤ <i>k</i> ≤ 13, -8 ≤ <i>l</i> ≤ 8   |                        |
| Reflections collected              | 13382                                                         |                        |
| Independent reflections            | 2437 [R(int) = 0.0556]                                        |                        |
| Completeness to theta = 25.10°     | 100.0 %                                                       |                        |
| Absorption correction              | Semi-empirical from equivalents                               |                        |
| Max. and min. transmission         | 0.9898 and 0.9823                                             |                        |
| Refinement method                  | Full-matrix least-squares on F <sup>2</sup>                   |                        |
| Data / restraints / parameters     | 2437 / 2 / 223                                                |                        |
| Goodness-of-fit on F <sup>2</sup>  | 0.900                                                         |                        |
| Final <i>R</i> indices [I > 2σ(I)] | <i>R</i> 1 = 0.0659, <i>wR</i> 2 = 0.1608                     |                        |
| <i>R</i> indices (all data)        | <i>R</i> 1 = 0.1108, <i>wR</i> 2 = 0.1773                     |                        |
| Largest diff. peak and hole        | 0.818 and -0.224 e.Å <sup>-3</sup>                            |                        |

Table 2. Atomic coordinates ( $\times 10^4$ ) and equivalent isotropic displacement parameters ( $\text{\AA}^2 \times 10^3$ ) for **5**.  $U(\text{eq})$  is defined as one third of the trace of the orthogonalized  $U^{ij}$  tensor.

|        | x        | y       | z       | U(eq) |
|--------|----------|---------|---------|-------|
| N(21)  | 920(2)   | 4346(2) | 4135(4) | 33(1) |
| N(22)  | 861(2)   | 2468(2) | 4268(4) | 24(1) |
| N(23)  | 874(2)   | 589(2)  | 4183(4) | 29(1) |
| N(24)  | -298(2)  | 1492(2) | 2744(4) | 23(1) |
| N(25)  | -1441(2) | 2501(2) | 1476(4) | 31(1) |
| N(26)  | -279(2)  | 3475(2) | 2716(4) | 23(1) |
| C(21)  | 486(2)   | 3437(2) | 3685(5) | 22(1) |
| C(23)  | 468(2)   | 1510(2) | 3711(4) | 20(1) |
| C(25)  | -657(2)  | 2487(2) | 2338(4) | 22(1) |
| O(12)  | 3649(2)  | 3962(2) | 2417(4) | 45(1) |
| O(14)  | 6292(2)  | 2241(2) | 4488(5) | 52(1) |
| O(17A) | 2401(2)  | 2722(2) | 1179(4) | 41(1) |
| O(17B) | 2503(2)  | 914(2)  | 1447(4) | 46(1) |
| C(11)  | 3739(2)  | 1984(3) | 2406(5) | 29(1) |
| C(12)  | 4097(2)  | 3025(3) | 2742(5) | 31(1) |
| C(13)  | 4957(2)  | 3123(3) | 3469(5) | 36(1) |
| C(14)  | 5442(2)  | 2203(3) | 3804(5) | 34(1) |
| C(15)  | 5097(2)  | 1161(3) | 3449(5) | 39(1) |
| C(16)  | 4251(2)  | 1076(3) | 2761(5) | 39(1) |
| C(17)  | 2827(2)  | 1872(3) | 1633(5) | 35(1) |
| O(90)  | -2931(2) | 860(3)  | 653(5)  | 59(1) |
| O(91)  | -2510(2) | 4443(3) | 501(5)  | 55(1) |

Table 3. Bond lengths [ $\text{\AA}$ ] and angles [ $^\circ$ ] for **5**.

|              |          |                     |          |
|--------------|----------|---------------------|----------|
| N(21)-C(21)  | 1.320(4) | C(21)-N(21)-H(21A)  | 120.0    |
| N(21)-H(21A) | 0.8600   | C(21)-N(21)-H(21B)  | 120.0    |
| N(21)-H(21B) | 0.8600   | H(21A)-N(21)-H(21B) | 120.0    |
| N(22)-C(23)  | 1.359(4) | C(23)-N(22)-C(21)   | 118.9(3) |
| N(22)-C(21)  | 1.362(4) | C(23)-N(22)-H(22)   | 120(3)   |
| N(22)-H(22)  | 0.85(5)  | C(21)-N(22)-H(22)   | 121(3)   |
| N(23)-C(23)  | 1.315(4) | C(23)-N(23)-H(23B)  | 120.0    |
| N(23)-H(23B) | 0.8600   | C(23)-N(23)-H(23A)  | 120.0    |
| N(23)-H(23A) | 0.8600   | H(23B)-N(23)-H(23A) | 120.0    |
| N(24)-C(23)  | 1.323(4) | C(23)-N(24)-C(25)   | 115.7(3) |
| N(24)-C(25)  | 1.354(4) | C(25)-N(25)-H(25A)  | 120.0    |
| N(25)-C(25)  | 1.318(4) | C(25)-N(25)-H(25B)  | 120.0    |
| N(25)-H(25A) | 0.8600   | H(25A)-N(25)-H(25B) | 120.0    |
| N(25)-H(25B) | 0.8600   | C(21)-N(26)-C(25)   | 115.4(3) |
| N(26)-C(21)  | 1.324(4) | N(21)-C(21)-N(26)   | 121.0(3) |
| N(26)-C(25)  | 1.356(4) | N(21)-C(21)-N(22)   | 117.0(3) |
| O(12)-C(12)  | 1.347(4) | N(26)-C(21)-N(22)   | 122.0(3) |
| O(12)-H(12)  | 0.8200   | N(23)-C(23)-N(24)   | 120.7(3) |
| O(14)-C(14)  | 1.376(4) | N(23)-C(23)-N(22)   | 117.5(3) |
| O(14)-H(14)  | 0.81(3)  | N(24)-C(23)-N(22)   | 121.8(3) |
| O(17A)-C(17) | 1.256(4) | N(25)-C(25)-N(24)   | 117.4(3) |
| O(17B)-C(17) | 1.273(4) | N(25)-C(25)-N(26)   | 116.8(3) |
| C(11)-C(16)  | 1.375(5) | N(24)-C(25)-N(26)   | 125.8(3) |
| C(11)-C(12)  | 1.396(5) | C(12)-O(12)-H(12)   | 109.5    |

|              |           |                     |          |
|--------------|-----------|---------------------|----------|
| C(11)-C(17)  | 1.489(5)  | C(14)-O(14)-H(14)   | 108(2)   |
| C(12)-C(13)  | 1.403(5)  | C(16)-C(11)-C(12)   | 118.6(3) |
| C(13)-C(14)  | 1.361(5)  | C(16)-C(11)-C(17)   | 121.2(3) |
| C(13)-H(13)  | 0.9300    | C(12)-C(11)-C(17)   | 120.2(3) |
| C(14)-C(15)  | 1.392(5)  | O(12)-C(12)-C(11)   | 122.9(3) |
| C(15)-C(16)  | 1.373(5)  | O(12)-C(12)-C(13)   | 117.3(3) |
| C(15)-H(15)  | 0.9300    | C(11)-C(12)-C(13)   | 119.8(3) |
| C(16)-H(16)  | 0.9300    | C(14)-C(13)-C(12)   | 119.8(3) |
| O(90)-H(90A) | 0.800(18) | C(14)-C(13)-H(13)   | 120.1    |
| O(90)-H(90B) | 0.814(19) | C(12)-C(13)-H(13)   | 120.1    |
| O(91)-H(91B) | 0.83(3)   | C(13)-C(14)-O(14)   | 122.8(3) |
| O(91)-H(91A) | 0.89(5)   | C(13)-C(14)-C(15)   | 121.1(3) |
|              |           | O(14)-C(14)-C(15)   | 116.2(3) |
|              |           | C(16)-C(15)-C(14)   | 118.5(3) |
|              |           | C(16)-C(15)-H(15)   | 120.7    |
|              |           | C(14)-C(15)-H(15)   | 120.7    |
|              |           | C(15)-C(16)-C(11)   | 122.3(3) |
|              |           | C(15)-C(16)-H(16)   | 118.9    |
|              |           | C(11)-C(16)-H(16)   | 118.9    |
|              |           | O(17A)-C(17)-O(17B) | 122.0(3) |
|              |           | O(17A)-C(17)-C(11)  | 119.1(3) |
|              |           | O(17B)-C(17)-C(11)  | 118.9(3) |
|              |           | H(90A)-O(90)-H(90B) | 97(4)    |
|              |           | H(91B)-O(91)-H(91A) | 97(4)    |

Symmetry transformations used to generate equivalent atoms:

Table 4. Anisotropic displacement parameters ( $\text{\AA}^2 \times 10^3$ ) for **5**. The anisotropic displacement factor exponent takes the form:  $-2\pi^2 [h^2 a^{*2} U^{11} + \dots + 2 h k a^* b^* U^{12}]$

|        | $U^{11}$ | $U^{22}$ | $U^{33}$ | $U^{23}$ | $U^{13}$ | $U^{12}$ |
|--------|----------|----------|----------|----------|----------|----------|
| N(21)  | 25(2)    | 18(1)    | 51(2)    | 1(1)     | -14(1)   | -4(1)    |
| N(22)  | 20(2)    | 21(1)    | 30(2)    | 3(1)     | -4(1)    | 0(1)     |
| N(23)  | 23(2)    | 17(1)    | 46(2)    | 1(1)     | -7(1)    | 1(1)     |
| N(24)  | 21(2)    | 16(1)    | 31(2)    | 0(1)     | -1(1)    | 2(1)     |
| N(25)  | 23(2)    | 19(1)    | 47(2)    | 0(1)     | -12(1)   | 1(1)     |
| N(26)  | 21(2)    | 17(1)    | 31(2)    | 1(1)     | -3(1)    | -1(1)    |
| C(21)  | 23(2)    | 19(2)    | 24(2)    | 2(1)     | -1(2)    | 1(1)     |
| C(23)  | 19(2)    | 18(2)    | 24(2)    | 1(1)     | 2(1)     | 0(1)     |
| C(25)  | 23(2)    | 23(2)    | 20(2)    | -2(2)    | 1(1)     | 0(1)     |
| O(12)  | 32(2)    | 29(1)    | 71(2)    | -1(1)    | -8(1)    | 3(1)     |
| O(14)  | 22(2)    | 47(2)    | 84(2)    | 6(2)     | -12(1)   | 1(1)     |
| O(17A) | 26(1)    | 41(2)    | 52(2)    | 5(1)     | -10(1)   | 8(1)     |
| O(17B) | 32(2)    | 36(2)    | 67(2)    | 2(1)     | -8(1)    | -7(1)    |
| C(11)  | 32(2)    | 24(2)    | 30(2)    | 1(2)     | 3(2)     | -1(2)    |
| C(12)  | 33(2)    | 30(2)    | 31(2)    | 2(2)     | 4(2)     | 10(2)    |
| C(13)  | 32(2)    | 35(2)    | 38(2)    | 3(2)     | -1(2)    | -5(2)    |
| C(14)  | 21(2)    | 43(2)    | 36(2)    | 4(2)     | -3(2)    | 4(2)     |
| C(15)  | 29(2)    | 37(2)    | 48(3)    | 3(2)     | -2(2)    | 5(2)     |
| C(16)  | 41(2)    | 28(2)    | 46(3)    | 1(2)     | 2(2)     | -1(2)    |
| C(17)  | 31(2)    | 35(2)    | 37(2)    | -5(2)    | 0(2)     | -4(2)    |
| O(90)  | 63(2)    | 39(2)    | 77(3)    | 6(2)     | 15(2)    | -1(2)    |
| O(91)  | 37(2)    | 43(2)    | 83(3)    | -10(2)   | -1(2)    | 2(2)     |

Table 5. Hydrogen coordinates ( $\times 10^4$ ) and isotropic displacement parameters ( $\text{\AA}^2 \times 10^{-3}$ ) for **5**.

|        | x         | y        | z        | U(eq)  |
|--------|-----------|----------|----------|--------|
| H(21A) | 707       | 4975     | 3797     | 39     |
| H(21B) | 1417      | 4308     | 4765     | 39     |
| H(23B) | 642       | -33      | 3864     | 35     |
| H(23A) | 1371      | 610      | 4812     | 35     |
| H(25A) | -1703     | 1893     | 1193     | 37     |
| H(25B) | -1689     | 3118     | 1195     | 37     |
| H(22)  | 1350(30)  | 2450(30) | 4910(60) | 64(14) |
| H(12)  | 3162      | 3814     | 1963     | 67     |
| H(13)  | 5195      | 3814     | 3722     | 43     |
| H(15)  | 5432      | 535      | 3673     | 46     |
| H(16)  | 4017      | 381      | 2528     | 46     |
| H(14)  | 6410(20)  | 2870(20) | 4770(40) | 10(9)  |
| H(90A) | -2630(20) | 370(20)  | 360(50)  | 36(12) |
| H(90B) | -3170(30) | 520(40)  | 1420(60) | 90(20) |
| H(91B) | -2940(20) | 4050(20) | 490(40)  | 7(8)   |
| H(91A) | -2600(30) | 4840(40) | 1500(70) | 90(20) |

## Crystallographic Information of **6**

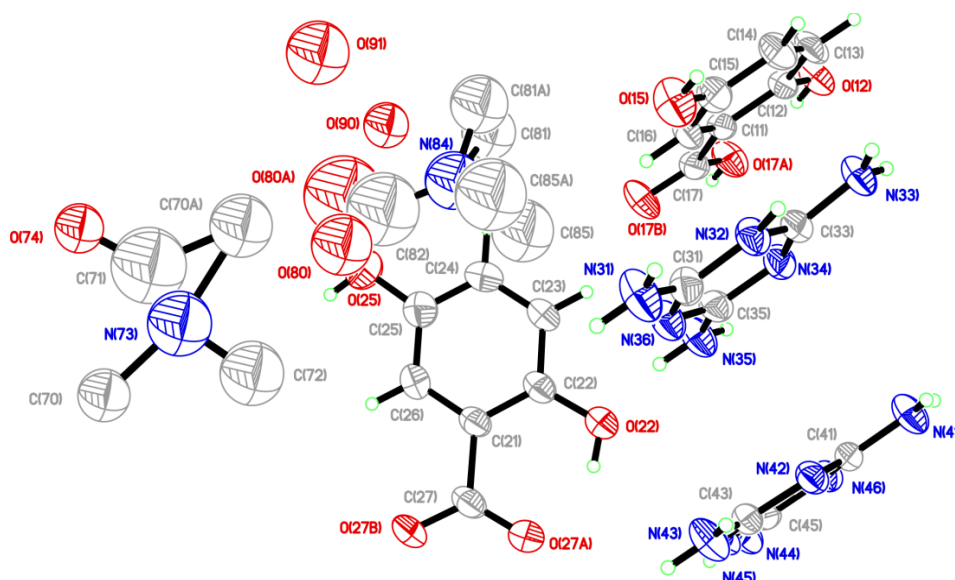

Figure 5. ORTEP drawing of the asymmetric unit of the complex **6**.

Table 1. Crystal data and structure refinement for **6**.

|                                    |                                                                 |                             |
|------------------------------------|-----------------------------------------------------------------|-----------------------------|
| Identification code                | <b>6</b>                                                        |                             |
| Empirical formula                  | C <sub>26</sub> H <sub>24</sub> N <sub>14</sub> O <sub>12</sub> |                             |
| Formula weight                     | 724.59                                                          |                             |
| Temperature                        | 298(2) K                                                        |                             |
| Wavelength                         | 0.71073 Å                                                       |                             |
| Crystal system                     | Monoclinic                                                      |                             |
| Space group                        | <i>C</i> 2/ <i>c</i>                                            |                             |
| Unit cell dimensions               | <i>a</i> = 38.011(5) Å                                          | $\alpha = 90^\circ$ .       |
|                                    | <i>b</i> = 9.212(5) Å                                           | $\beta = 99.440(5)^\circ$ . |
|                                    | <i>c</i> = 20.430(5) Å                                          | $\gamma = 90^\circ$ .       |
| Volume                             | 7057(4) Å <sup>3</sup>                                          |                             |
| <i>Z</i>                           | 8                                                               |                             |
| Density (calculated)               | 1.364 Mg/m <sup>3</sup>                                         |                             |
| Absorption coefficient             | 0.111 mm <sup>-1</sup>                                          |                             |
| F(000)                             | 2992                                                            |                             |
| Crystal size                       | 0.17 x 0.14 x 0.09 mm <sup>3</sup>                              |                             |
| Theta range for data collection    | 2.13 to 25.24°.                                                 |                             |
| Index ranges                       | -45 ≤ <i>h</i> ≤ 45, -11 ≤ <i>k</i> ≤ 11, -24 ≤ <i>l</i> ≤ 24   |                             |
| Reflections collected              | 34754                                                           |                             |
| Independent reflections            | 6376 [R(int) = 0.0515]                                          |                             |
| Completeness to theta = 25.24°     | 100.0 %                                                         |                             |
| Absorption correction              | Semi-empirical from equivalents                                 |                             |
| Max. and min. transmission         | 0.9901 and 0.9814                                               |                             |
| Refinement method                  | Full-matrix least-squares on F <sup>2</sup>                     |                             |
| Data / restraints / parameters     | 6376 / 0 / 429                                                  |                             |
| Goodness-of-fit on F <sup>2</sup>  | 1.049                                                           |                             |
| Final <i>R</i> indices [I > 2σ(I)] | <i>R</i> 1 = 0.0929, <i>wR</i> 2 = 0.2892                       |                             |
| <i>R</i> indices (all data)        | <i>R</i> 1 = 0.1533, <i>wR</i> 2 = 0.3227                       |                             |
| Largest diff. peak and hole        | 1.163 and -0.592 e.Å <sup>-3</sup>                              |                             |



Table 2. Atomic coordinates ( $\times 10^4$ ) and equivalent isotropic displacement parameters ( $\text{\AA}^2 \times 10^3$ ) for **6**.  $U(\text{eq})$  is defined as one third of the trace of the orthogonalized  $U^{ij}$  tensor.

|        | x       | y         | z        | U(eq)   |
|--------|---------|-----------|----------|---------|
| O(80)  | 5002(3) | 7059(14)  | 4042(6)  | 116(4)  |
| O(80A) | 5011(7) | 5880(30)  | 3837(11) | 204(10) |
| N(84)  | 5438(2) | 6583(8)   | 3433(3)  | 106(2)  |
| C(81)  | 5625(5) | 5278(19)  | 3213(10) | 99(6)   |
| C(81A) | 5510(5) | 5480(20)  | 2913(10) | 110(6)  |
| C(82)  | 5188(5) | 6297(19)  | 3839(8)  | 173(6)  |
| C(85)  | 5748(5) | 7690(20)  | 3598(10) | 123(6)  |
| C(85A) | 5499(6) | 8080(30)  | 3201(12) | 155(8)  |
| O(12)  | 7388(1) | 3030(3)   | 2747(2)  | 46(1)   |
| O(15)  | 6276(1) | 6948(4)   | 2402(2)  | 61(1)   |
| O(17A) | 7208(1) | 2338(4)   | 3826(2)  | 52(1)   |
| O(17B) | 6730(1) | 3264(4)   | 4159(2)  | 56(1)   |
| C(11)  | 6880(1) | 4098(5)   | 3143(2)  | 34(1)   |
| C(12)  | 7110(1) | 3986(5)   | 2677(2)  | 35(1)   |
| C(13)  | 7059(1) | 4879(5)   | 2118(2)  | 45(1)   |
| C(14)  | 6782(1) | 5864(5)   | 2018(2)  | 44(1)   |
| C(15)  | 6556(1) | 5977(5)   | 2477(2)  | 44(1)   |
| C(16)  | 6608(1) | 5095(5)   | 3040(2)  | 40(1)   |
| C(17)  | 6933(1) | 3197(5)   | 3756(2)  | 37(1)   |
| O(91)  | 4853(2) | 2882(7)   | 3101(3)  | 141(2)  |
| O(74)  | 3755(1) | 8606(4)   | 3742(2)  | 66(1)   |
| N(73)  | 4233(2) | 9910(8)   | 4199(4)  | 113(2)  |
| C(70)  | 4004(3) | 10278(14) | 4810(6)  | 75(4)   |
| C(70A) | 4382(4) | 9282(18)  | 3426(8)  | 108(5)  |
| C(71)  | 4061(3) | 9228(14)  | 3868(6)  | 157(4)  |
| C(72)  | 4564(2) | 10602(9)  | 4418(4)  | 112(3)  |
| O(22)  | 6623(1) | 6873(4)   | 5692(2)  | 51(1)   |
| O(25)  | 5444(1) | 3322(5)   | 5170(2)  | 87(1)   |
| O(27A) | 6387(1) | 7832(4)   | 6703(2)  | 51(1)   |
| O(27B) | 5869(1) | 7085(4)   | 6955(2)  | 58(1)   |
| C(21)  | 6070(1) | 6054(5)   | 6007(2)  | 38(1)   |
| C(22)  | 6325(1) | 6023(5)   | 5589(2)  | 40(1)   |
| C(23)  | 6281(1) | 5113(6)   | 5047(2)  | 48(1)   |
| C(24)  | 5987(2) | 4223(6)   | 4915(3)  | 60(2)   |
| C(25)  | 5732(2) | 4236(6)   | 5324(3)  | 58(2)   |
| C(26)  | 5771(1) | 5152(6)   | 5866(2)  | 50(1)   |
| C(27)  | 6110(1) | 7053(5)   | 6603(2)  | 44(1)   |
| N(31)  | 6005(1) | 11416(5)  | 3215(2)  | 56(1)   |
| N(32)  | 6487(1) | 10536(4)  | 2801(2)  | 38(1)   |
| N(33)  | 6956(1) | 9641(4)   | 2352(2)  | 44(1)   |
| N(34)  | 6881(1) | 8873(4)   | 3393(2)  | 37(1)   |
| N(35)  | 6759(1) | 8105(4)   | 4387(2)  | 47(1)   |
| N(36)  | 6373(1) | 9758(4)   | 3834(2)  | 41(1)   |
| C(31)  | 6289(1) | 10561(5)  | 3303(2)  | 40(1)   |
| C(33)  | 6776(1) | 9672(5)   | 2861(2)  | 35(1)   |
| C(35)  | 6668(1) | 8948(5)   | 3857(2)  | 36(1)   |
| O(90)  | 5410(1) | 1593(4)   | 4011(2)  | 80(1)   |
| N(41)  | 7725(1) | 9955(5)   | 4512(2)  | 48(1)   |
| N(42)  | 7619(1) | 8970(4)   | 5501(2)  | 35(1)   |
| N(43)  | 7485(1) | 8120(4)   | 6471(2)  | 43(1)   |
| N(44)  | 7120(1) | 9908(4)   | 5963(2)  | 38(1)   |
| N(45)  | 6788(1) | 11741(4)  | 5402(2)  | 51(1)   |

|       |         |          |         |       |
|-------|---------|----------|---------|-------|
| N(46) | 7261(1) | 10853(4) | 4976(2) | 36(1) |
| C(41) | 7536(1) | 9903(5)  | 5009(2) | 34(1) |
| C(43) | 7403(1) | 9028(5)  | 5968(2) | 34(1) |
| C(45) | 7055(1) | 10805(5) | 5458(2) | 34(1) |

Table 3. Bond lengths [Å] and angles [°] for **6**.

|               |           |                     |           |
|---------------|-----------|---------------------|-----------|
| O(80)-C(82)   | 1.123(18) | C(82)-O(80)-O(80A)  | 39.4(14)  |
| O(80)-O(80A)  | 1.17(2)   | C(82)-O(80A)-O(80)  | 67(2)     |
| O(80A)-C(82)  | 0.77(3)   | C(82)-N(84)-C(85A)  | 121.7(13) |
| N(84)-C(82)   | 1.385(17) | C(82)-N(84)-C(81)   | 115.5(11) |
| N(84)-C(85A)  | 1.49(2)   | C(85A)-N(84)-C(81)  | 122.7(13) |
| N(84)-C(81)   | 1.502(19) | C(82)-N(84)-C(81A)  | 120.5(12) |
| N(84)-C(81A)  | 1.53(2)   | C(85A)-N(84)-C(81A) | 110.0(13) |
| N(84)-C(85)   | 1.551(19) | C(81)-N(84)-C(81A)  | 27.3(9)   |
| C(81)-C(81A)  | 0.71(2)   | C(82)-N(84)-C(85)   | 124.5(12) |
| C(85)-C(85A)  | 1.20(3)   | C(85A)-N(84)-C(85)  | 46.3(10)  |
| O(12)-C(12)   | 1.363(5)  | C(81)-N(84)-C(85)   | 102.2(10) |
| O(12)-H(12)   | 0.8200    | C(81A)-N(84)-C(85)  | 111.9(11) |
| O(15)-C(15)   | 1.379(6)  | C(81A)-C(81)-N(84)  | 78(3)     |
| O(15)-H(15)   | 0.8200    | C(81)-C(81A)-N(84)  | 74(2)     |
| O(17A)-C(17)  | 1.299(5)  | O(80A)-C(82)-O(80)  | 73(3)     |
| O(17A)-H(17A) | 0.8200    | O(80A)-C(82)-N(84)  | 141(3)    |
| O(17B)-C(17)  | 1.220(5)  | O(80)-C(82)-N(84)   | 129.6(18) |
| C(11)-C(16)   | 1.373(6)  | C(85A)-C(85)-N(84)  | 64.2(15)  |
| C(11)-C(12)   | 1.398(6)  | C(85)-C(85A)-N(84)  | 69.6(15)  |
| C(11)-C(17)   | 1.489(6)  | C(12)-O(12)-H(12)   | 109.5     |
| C(12)-C(13)   | 1.394(6)  | C(15)-O(15)-H(15)   | 109.5     |
| C(13)-C(14)   | 1.380(7)  | C(17)-O(17A)-H(17A) | 109.5     |
| C(13)-H(13)   | 0.9300    | C(16)-C(11)-C(12)   | 118.9(4)  |
| C(14)-C(15)   | 1.374(6)  | C(16)-C(11)-C(17)   | 119.8(4)  |
| C(14)-H(14)   | 0.9300    | C(12)-C(11)-C(17)   | 121.3(4)  |
| C(15)-C(16)   | 1.396(6)  | O(12)-C(12)-C(13)   | 118.0(4)  |
| C(16)-H(16)   | 0.9300    | O(12)-C(12)-C(11)   | 122.4(4)  |
| O(74)-C(71)   | 1.285(13) | C(13)-C(12)-C(11)   | 119.6(4)  |
| N(73)-C(71)   | 1.066(12) | C(14)-C(13)-C(12)   | 120.8(4)  |
| N(73)-C(72)   | 1.414(10) | C(14)-C(13)-H(13)   | 119.6     |
| N(73)-C(70)   | 1.672(14) | C(12)-C(13)-H(13)   | 119.6     |
| N(73)-C(70A)  | 1.854(18) | C(15)-C(14)-C(13)   | 119.6(4)  |
| C(70A)-C(71)  | 1.635(18) | C(15)-C(14)-H(14)   | 120.2     |
| O(22)-C(22)   | 1.366(6)  | C(13)-C(14)-H(14)   | 120.2     |
| O(22)-H(22)   | 0.8200    | C(14)-C(15)-O(15)   | 122.0(4)  |
| O(25)-C(25)   | 1.377(6)  | C(14)-C(15)-C(16)   | 119.8(5)  |
| O(25)-H(25)   | 0.8200    | O(15)-C(15)-C(16)   | 118.1(4)  |
| O(27A)-C(27)  | 1.263(6)  | C(11)-C(16)-C(15)   | 121.2(4)  |
| O(27B)-C(27)  | 1.254(5)  | C(11)-C(16)-H(16)   | 119.4     |
| C(21)-C(22)   | 1.390(6)  | C(15)-C(16)-H(16)   | 119.4     |
| C(21)-C(26)   | 1.400(7)  | O(17B)-C(17)-O(17A) | 123.0(4)  |
| C(21)-C(27)   | 1.514(6)  | O(17B)-C(17)-C(11)  | 121.7(4)  |
| C(22)-C(23)   | 1.378(6)  | O(17A)-C(17)-C(11)  | 115.3(4)  |
| C(23)-C(24)   | 1.375(7)  | C(71)-N(73)-C(72)   | 152.7(11) |
| C(23)-H(23)   | 0.9300    | C(71)-N(73)-C(70)   | 104.5(10) |
| C(24)-C(25)   | 1.380(7)  | C(72)-N(73)-C(70)   | 102.6(8)  |
| C(24)-H(24)   | 0.9300    | C(71)-N(73)-C(70A)  | 61.2(9)   |
| C(25)-C(26)   | 1.382(7)  | C(72)-N(73)-C(70A)  | 91.8(7)   |
| C(26)-H(26)   | 0.9300    | C(70)-N(73)-C(70A)  | 165.6(9)  |

|              |          |                     |           |
|--------------|----------|---------------------|-----------|
| N(31)-C(31)  | 1.323(6) | C(71)-C(70A)-N(73)  | 34.9(6)   |
| N(31)-H(31A) | 0.8600   | N(73)-C(71)-O(74)   | 146.5(13) |
| N(31)-H(31B) | 0.8600   | N(73)-C(71)-C(70A)  | 83.9(11)  |
| N(32)-C(33)  | 1.346(6) | O(74)-C(71)-C(70A)  | 129.6(12) |
| N(32)-C(31)  | 1.369(6) | C(22)-O(22)-H(22)   | 109.5     |
| N(32)-H(32)  | 1.01(6)  | C(25)-O(25)-H(25)   | 109.5     |
| N(33)-C(33)  | 1.337(5) | C(22)-C(21)-C(26)   | 119.0(4)  |
| N(33)-H(33B) | 0.8600   | C(22)-C(21)-C(27)   | 121.2(4)  |
| N(33)-H(33A) | 0.8600   | C(26)-C(21)-C(27)   | 119.7(4)  |
| N(34)-C(33)  | 1.318(5) | O(22)-C(22)-C(23)   | 117.4(4)  |
| N(34)-C(35)  | 1.346(5) | O(22)-C(22)-C(21)   | 122.5(4)  |
| N(35)-C(35)  | 1.331(5) | C(23)-C(22)-C(21)   | 120.1(5)  |
| N(35)-H(35B) | 0.8600   | C(24)-C(23)-C(22)   | 120.5(5)  |
| N(35)-H(5B)  | 0.8600   | C(24)-C(23)-H(23)   | 119.8     |
| N(36)-C(31)  | 1.308(6) | C(22)-C(23)-H(23)   | 119.8     |
| N(36)-C(35)  | 1.341(6) | C(23)-C(24)-C(25)   | 120.2(5)  |
| N(41)-C(41)  | 1.337(5) | C(23)-C(24)-H(24)   | 119.9     |
| N(41)-H(41B) | 0.8600   | C(25)-C(24)-H(24)   | 119.9     |
| N(41)-H(41A) | 0.8600   | O(25)-C(25)-C(24)   | 118.0(5)  |
| N(42)-C(41)  | 1.321(5) | O(25)-C(25)-C(26)   | 122.1(5)  |
| N(42)-C(43)  | 1.357(5) | C(24)-C(25)-C(26)   | 119.9(5)  |
| N(43)-C(43)  | 1.322(5) | C(25)-C(26)-C(21)   | 120.2(5)  |
| N(43)-H(43B) | 0.8600   | C(25)-C(26)-H(26)   | 119.9     |
| N(43)-H(43A) | 0.8600   | C(21)-C(26)-H(26)   | 119.9     |
| N(44)-C(45)  | 1.314(5) | O(27B)-C(27)-O(27A) | 124.2(4)  |
| N(44)-C(43)  | 1.345(6) | O(27B)-C(27)-C(21)  | 119.3(5)  |
| N(45)-C(45)  | 1.322(6) | O(27A)-C(27)-C(21)  | 116.4(4)  |
| N(45)-H(45A) | 0.8600   | C(31)-N(31)-H(31A)  | 120.0     |
| N(45)-H(45B) | 0.8600   | C(31)-N(31)-H(31B)  | 120.0     |
| N(46)-C(41)  | 1.354(6) | H(31A)-N(31)-H(31B) | 120.0     |
| N(46)-C(45)  | 1.357(5) | C(33)-N(32)-C(31)   | 118.8(4)  |
|              |          | C(33)-N(32)-H(32)   | 113(4)    |
|              |          | C(31)-N(32)-H(32)   | 128(4)    |
|              |          | C(33)-N(33)-H(33B)  | 120.0     |
|              |          | C(33)-N(33)-H(33A)  | 120.0     |
|              |          | H(33B)-N(33)-H(33A) | 120.0     |
|              |          | C(33)-N(34)-C(35)   | 114.7(4)  |
|              |          | C(35)-N(35)-H(35B)  | 120.0     |
|              |          | C(35)-N(35)-H(5B)   | 120.0     |
|              |          | H(35B)-N(35)-H(5B)  | 120.0     |
|              |          | C(31)-N(36)-C(35)   | 115.7(4)  |
|              |          | N(36)-C(31)-N(31)   | 122.2(4)  |
|              |          | N(36)-C(31)-N(32)   | 121.5(4)  |
|              |          | N(31)-C(31)-N(32)   | 116.4(4)  |
|              |          | N(34)-C(33)-N(33)   | 120.4(4)  |
|              |          | N(34)-C(33)-N(32)   | 122.5(4)  |
|              |          | N(33)-C(33)-N(32)   | 117.1(4)  |
|              |          | N(35)-C(35)-N(36)   | 117.4(4)  |
|              |          | N(35)-C(35)-N(34)   | 115.9(4)  |
|              |          | N(36)-C(35)-N(34)   | 126.7(4)  |
|              |          | C(41)-N(41)-H(41B)  | 120.0     |
|              |          | C(41)-N(41)-H(41A)  | 120.0     |
|              |          | H(41B)-N(41)-H(41A) | 120.0     |
|              |          | C(41)-N(42)-C(43)   | 114.4(4)  |
|              |          | C(43)-N(43)-H(43B)  | 120.0     |
|              |          | C(43)-N(43)-H(43A)  | 120.0     |
|              |          | H(43B)-N(43)-H(43A) | 120.0     |
|              |          | C(45)-N(44)-C(43)   | 115.6(4)  |
|              |          | C(45)-N(45)-H(45A)  | 120.0     |
|              |          | C(45)-N(45)-H(45B)  | 120.0     |

|                     |          |
|---------------------|----------|
| H(45A)-N(45)-H(45B) | 120.0    |
| C(41)-N(46)-C(45)   | 118.4(4) |
| N(42)-C(41)-N(41)   | 120.7(4) |
| N(42)-C(41)-N(46)   | 122.9(4) |
| N(41)-C(41)-N(46)   | 116.4(4) |
| N(43)-C(43)-N(44)   | 118.2(4) |
| N(43)-C(43)-N(42)   | 115.5(4) |
| N(44)-C(43)-N(42)   | 126.3(4) |
| N(44)-C(45)-N(45)   | 121.4(4) |
| N(44)-C(45)-N(46)   | 122.2(4) |
| N(45)-C(45)-N(46)   | 116.3(4) |

Symmetry transformations used to generate equivalent atoms:

Table 4. Anisotropic displacement parameters ( $\text{\AA}^2 \times 10^3$ ) for **6**. The anisotropic displacement factor exponent takes the form:  $-2\pi^2 [ h^2 a^{*2} U^{11} + \dots + 2 h k a^* b^* U^{12} ]$

|        | U <sup>11</sup> | U <sup>22</sup> | U <sup>33</sup> | U <sup>23</sup> | U <sup>13</sup> | U <sup>12</sup> |
|--------|-----------------|-----------------|-----------------|-----------------|-----------------|-----------------|
| O(12)  | 53(2)           | 54(2)           | 34(2)           | 5(2)            | 17(2)           | 14(2)           |
| O(15)  | 58(2)           | 65(2)           | 62(2)           | 15(2)           | 16(2)           | 15(2)           |
| O(17A) | 64(2)           | 62(2)           | 31(2)           | 17(2)           | 15(2)           | 7(2)            |
| O(17B) | 69(2)           | 68(2)           | 38(2)           | 11(2)           | 30(2)           | 6(2)            |
| C(11)  | 40(3)           | 36(3)           | 28(2)           | -5(2)           | 10(2)           | -9(2)           |
| C(12)  | 41(3)           | 38(3)           | 30(2)           | -5(2)           | 11(2)           | -5(2)           |
| C(13)  | 59(3)           | 52(3)           | 27(2)           | 2(2)            | 21(2)           | -6(3)           |
| C(14)  | 56(3)           | 44(3)           | 35(3)           | 10(2)           | 13(2)           | 6(3)            |
| C(15)  | 46(3)           | 47(3)           | 40(3)           | 2(2)            | 8(2)            | -2(2)           |
| C(16)  | 40(3)           | 50(3)           | 33(3)           | 3(2)            | 15(2)           | 3(2)            |
| C(17)  | 42(3)           | 37(3)           | 32(2)           | -3(2)           | 8(2)            | -5(2)           |
| O(22)  | 51(2)           | 63(2)           | 42(2)           | -13(2)          | 19(2)           | -11(2)          |
| O(25)  | 74(3)           | 97(3)           | 95(3)           | -41(3)          | 32(2)           | -43(3)          |
| O(27A) | 52(2)           | 60(2)           | 42(2)           | -12(2)          | 12(2)           | -6(2)           |
| O(27B) | 52(2)           | 82(3)           | 44(2)           | -20(2)          | 22(2)           | -2(2)           |
| C(21)  | 39(3)           | 46(3)           | 29(2)           | -2(2)           | 9(2)            | 6(2)            |
| C(22)  | 44(3)           | 46(3)           | 32(3)           | 0(2)            | 12(2)           | 3(2)            |
| C(23)  | 49(3)           | 60(3)           | 38(3)           | -9(2)           | 19(2)           | -3(3)           |
| C(24)  | 64(4)           | 71(4)           | 46(3)           | -22(3)          | 16(3)           | -10(3)          |
| C(25)  | 56(3)           | 64(4)           | 58(3)           | -13(3)          | 20(3)           | -15(3)          |
| C(26)  | 41(3)           | 65(3)           | 47(3)           | -7(3)           | 17(2)           | -5(3)           |
| C(27)  | 48(3)           | 54(3)           | 34(3)           | -5(2)           | 14(2)           | 6(3)            |
| N(31)  | 53(3)           | 71(3)           | 48(3)           | 19(2)           | 22(2)           | 19(2)           |
| N(32)  | 38(2)           | 47(2)           | 30(2)           | 8(2)            | 9(2)            | 1(2)            |
| N(33)  | 47(2)           | 55(3)           | 33(2)           | 7(2)            | 19(2)           | 3(2)            |
| N(34)  | 39(2)           | 43(2)           | 30(2)           | 5(2)            | 10(2)           | -3(2)           |
| N(35)  | 54(3)           | 57(3)           | 35(2)           | 12(2)           | 18(2)           | 8(2)            |
| N(36)  | 40(2)           | 51(2)           | 35(2)           | 9(2)            | 12(2)           | 8(2)            |
| C(31)  | 39(3)           | 41(3)           | 42(3)           | 0(2)            | 13(2)           | -4(2)           |
| C(33)  | 35(3)           | 42(3)           | 27(2)           | 0(2)            | 9(2)            | -2(2)           |
| C(35)  | 44(3)           | 39(3)           | 26(2)           | 2(2)            | 8(2)            | -4(2)           |
| N(41)  | 53(3)           | 62(3)           | 31(2)           | 10(2)           | 17(2)           | 8(2)            |
| N(42)  | 41(2)           | 39(2)           | 26(2)           | 4(2)            | 8(2)            | -1(2)           |
| N(43)  | 53(2)           | 46(2)           | 32(2)           | 10(2)           | 19(2)           | 2(2)            |
| N(44)  | 43(2)           | 47(2)           | 26(2)           | -2(2)           | 16(2)           | 1(2)            |
| N(45)  | 60(3)           | 58(3)           | 40(2)           | 7(2)            | 25(2)           | 11(2)           |
| N(46)  | 41(2)           | 39(2)           | 30(2)           | 0(2)            | 12(2)           | -1(2)           |
| C(41)  | 33(2)           | 42(3)           | 26(2)           | -4(2)           | 8(2)            | -9(2)           |

|       |       |       |       |       |      |        |
|-------|-------|-------|-------|-------|------|--------|
| C(43) | 41(3) | 35(3) | 27(2) | -6(2) | 6(2) | -12(2) |
| C(45) | 37(3) | 38(3) | 27(2) | -1(2) | 9(2) | -5(2)  |

Table 5. Hydrogen coordinates ( $\times 10^4$ ) and isotropic displacement parameters ( $\text{\AA}^2 \times 10^3$ ) for **6**.

|        | x    | y     | z    | U(eq) |
|--------|------|-------|------|-------|
| H(12)  | 7397 | 2589  | 3098 | 69    |
| H(15)  | 6275 | 7417  | 2061 | 91    |
| H(17A) | 7219 | 1881  | 4173 | 77    |
| H(13)  | 7213 | 4809  | 1810 | 53    |
| H(14)  | 6748 | 6448  | 1641 | 53    |
| H(16)  | 6456 | 5184  | 3350 | 48    |
| H(22)  | 6622 | 7370  | 6025 | 76    |
| H(25)  | 5321 | 3366  | 5464 | 130   |
| H(23)  | 6452 | 5100  | 4769 | 58    |
| H(24)  | 5961 | 3611  | 4548 | 72    |
| H(26)  | 5598 | 5170  | 6139 | 60    |
| H(31A) | 5869 | 11456 | 3512 | 67    |
| H(31B) | 5957 | 11931 | 2861 | 67    |
| H(33B) | 7141 | 9098  | 2369 | 52    |
| H(33A) | 6886 | 10165 | 2006 | 52    |
| H(35B) | 6631 | 8094  | 4696 | 57    |
| H(5B)  | 6947 | 7570  | 4420 | 57    |
| H(32)  | 6459 | 11170 | 2390 | 90    |
| H(41B) | 7902 | 9376  | 4510 | 57    |
| H(41A) | 7669 | 10566 | 4194 | 57    |
| H(43B) | 7358 | 8103  | 6783 | 51    |
| H(43A) | 7664 | 7546  | 6486 | 51    |
| H(45A) | 6653 | 11773 | 5701 | 61    |
| H(45B) | 6750 | 12319 | 5068 | 61    |

### Crystallographic Information of **7**

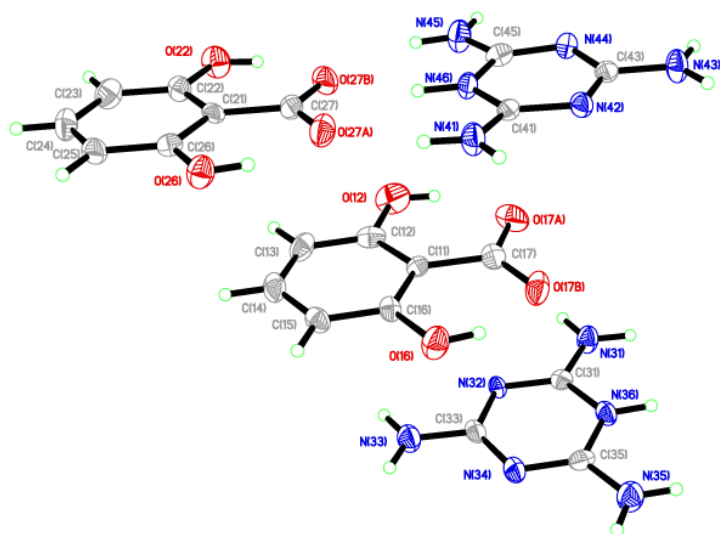

Figure 6. ORTEP drawing of the asymmetric unit of the complex **7**.

Table 1. Crystal data and structure refinement for **7**.

|                                          |                                                               |                        |
|------------------------------------------|---------------------------------------------------------------|------------------------|
| Identification code                      | <b>7</b>                                                      |                        |
| Empirical formula                        | C <sub>10</sub> H <sub>12</sub> N <sub>6</sub> O <sub>4</sub> |                        |
| Formula weight                           | 280.26                                                        |                        |
| Temperature                              | 150(2) K                                                      |                        |
| Wavelength                               | 0.71073 Å                                                     |                        |
| Crystal system                           | Monoclinic                                                    |                        |
| Space group                              | P2 <sub>1</sub> /c                                            |                        |
| Unit cell dimensions                     | <i>a</i> = 14.3720(10) Å                                      | <i>α</i> = 90.000(7)°. |
|                                          | <i>b</i> = 8.5490(10) Å                                       | <i>β</i> = 114.23°.    |
|                                          | <i>c</i> = 20.671(2) Å                                        | <i>γ</i> = 90°.        |
| Volume                                   | 2316.0(4) Å <sup>3</sup>                                      |                        |
| <i>Z</i>                                 | 8                                                             |                        |
| Density (calculated)                     | 1.607 Mg/m <sup>3</sup>                                       |                        |
| Absorption coefficient                   | 0.128 mm <sup>-1</sup>                                        |                        |
| <i>F</i> (000)                           | 1168                                                          |                        |
| Crystal size                             | 0.16 x 0.12 x 0.11 mm <sup>3</sup>                            |                        |
| Theta range for data collection          | 2.16 to 25.24°.                                               |                        |
| Index ranges                             | -17 ≤ <i>h</i> ≤ 17, -10 ≤ <i>k</i> ≤ 10, -24 ≤ <i>l</i> ≤ 24 |                        |
| Reflections collected                    | 21344                                                         |                        |
| Independent reflections                  | 4184 [R(int) = 0.0849]                                        |                        |
| Completeness to theta = 25.24°           | 100.0 %                                                       |                        |
| Absorption correction                    | Semi-empirical from equivalents                               |                        |
| Max. and min. transmission               | 0.9861 and 0.9798                                             |                        |
| Refinement method                        | Full-matrix least-squares on <i>F</i> <sup>2</sup>            |                        |
| Data / restraints / parameters           | 4184 / 0 / 361                                                |                        |
| Goodness-of-fit on <i>F</i> <sup>2</sup> | 0.771                                                         |                        |
| Final <i>R</i> indices [I > 2σ(I)]       | <i>R</i> 1 = 0.0464, <i>wR</i> 2 = 0.0838                     |                        |
| <i>R</i> indices (all data)              | <i>R</i> 1 = 0.1371, <i>wR</i> 2 = 0.0984                     |                        |
| Largest diff. peak and hole              | 0.261 and -0.237 e.Å <sup>-3</sup>                            |                        |

Table 2. Atomic coordinates ( × 10<sup>4</sup>) and equivalent isotropic displacement parameters (Å<sup>2</sup> × 10<sup>3</sup>) for **7**. U(eq) is defined as one third of the trace of the orthogonalized U<sup>ij</sup> tensor.

|       | <i>x</i> | <i>y</i> | <i>z</i> | U(eq) |
|-------|----------|----------|----------|-------|
| O(12) | 6621(2)  | 7318(3)  | 7670(1)  | 42(1) |
| O(16) | 9928(2)  | 6160(2)  | 7739(1)  | 32(1) |

|        |          |         |          |       |
|--------|----------|---------|----------|-------|
| O(17A) | 7822(2)  | 5448(3) | 8598(1)  | 40(1) |
| O(17B) | 9387(2)  | 5009(2) | 8661(1)  | 34(1) |
| C(11)  | 8289(2)  | 6693(4) | 7747(2)  | 18(1) |
| C(12)  | 7364(3)  | 7496(4) | 7426(2)  | 24(1) |
| C(13)  | 7168(3)  | 8469(4) | 6856(2)  | 29(1) |
| C(14)  | 7895(3)  | 8654(4) | 6587(2)  | 29(1) |
| C(15)  | 8822(3)  | 7877(4) | 6887(2)  | 23(1) |
| C(16)  | 9013(2)  | 6913(4) | 7460(2)  | 19(1) |
| C(17)  | 8510(3)  | 5666(4) | 8376(2)  | 26(1) |
| O(22)  | 4295(2)  | 7340(2) | 5395(1)  | 34(1) |
| O(26)  | 7322(2)  | 6172(2) | 5051(1)  | 29(1) |
| O(27A) | 7010(2)  | 4877(2) | 6023(1)  | 32(1) |
| O(27B) | 5615(2)  | 5412(2) | 6206(1)  | 31(1) |
| C(21)  | 5826(3)  | 6691(4) | 5257(2)  | 19(1) |
| C(22)  | 4899(3)  | 7505(4) | 5037(2)  | 23(1) |
| C(23)  | 4588(3)  | 8502(4) | 4464(2)  | 32(1) |
| C(24)  | 5203(3)  | 8729(4) | 4104(2)  | 30(1) |
| C(25)  | 6116(3)  | 7960(4) | 4303(2)  | 27(1) |
| C(26)  | 6426(2)  | 6938(4) | 4871(2)  | 22(1) |
| C(27)  | 6168(3)  | 5597(4) | 5863(1)  | 25(1) |
| N(31)  | 9181(2)  | 7137(3) | 10230(1) | 27(1) |
| N(32)  | 9552(2)  | 8517(3) | 9406(1)  | 20(1) |
| N(33)  | 10008(2) | 9745(3) | 8607(1)  | 29(1) |
| N(34)  | 11203(2) | 8111(3) | 9383(1)  | 24(1) |
| N(35)  | 12316(2) | 6417(3) | 10202(1) | 33(1) |
| N(36)  | 10735(2) | 6781(3) | 10195(1) | 22(1) |
| C(31)  | 9812(2)  | 7516(4) | 9930(2)  | 18(1) |
| C(33)  | 10269(3) | 8764(3) | 9147(2)  | 22(1) |
| C(35)  | 11417(2) | 7137(4) | 9916(2)  | 23(1) |
| N(41)  | 8139(2)  | 2704(3) | 7075(1)  | 28(1) |
| N(42)  | 7931(2)  | 1459(3) | 7999(1)  | 21(1) |
| N(43)  | 7584(2)  | 264(3)  | 8862(1)  | 29(1) |
| N(44)  | 6356(2)  | 1931(3) | 8136(1)  | 25(1) |
| N(45)  | 5242(2)  | 3762(3) | 7410(1)  | 33(1) |
| N(46)  | 6709(2)  | 3228(3) | 7263(1)  | 23(1) |
| C(41)  | 7608(3)  | 2446(4) | 7453(2)  | 21(1) |
| C(43)  | 7281(3)  | 1242(4) | 8320(2)  | 22(1) |
| C(45)  | 6104(3)  | 2948(4) | 7615(2)  | 24(1) |

Table 3. Bond lengths [Å] and angles [°] for **7**.

|              |          |                     |          |
|--------------|----------|---------------------|----------|
| O(12)-C(12)  | 1.365(4) | C(12)-C(11)-C(16)   | 117.2(3) |
| O(16)-C(16)  | 1.361(4) | C(12)-C(11)-C(17)   | 121.7(3) |
| O(17A)-C(17) | 1.265(3) | C(16)-C(11)-C(17)   | 121.1(3) |
| O(17B)-C(17) | 1.281(3) | O(12)-C(12)-C(13)   | 118.0(3) |
| C(11)-C(12)  | 1.398(4) | O(12)-C(12)-C(11)   | 120.3(3) |
| C(11)-C(16)  | 1.408(4) | C(13)-C(12)-C(11)   | 121.7(3) |
| C(11)-C(17)  | 1.490(4) | C(12)-C(13)-C(14)   | 119.5(3) |
| C(12)-C(13)  | 1.373(4) | C(13)-C(14)-C(15)   | 120.9(3) |
| C(13)-C(14)  | 1.378(4) | C(16)-C(15)-C(14)   | 119.1(3) |
| C(14)-C(15)  | 1.387(4) | O(16)-C(16)-C(15)   | 117.8(3) |
| C(15)-C(16)  | 1.376(4) | O(16)-C(16)-C(11)   | 120.7(3) |
| O(22)-C(22)  | 1.360(4) | C(15)-C(16)-C(11)   | 121.5(3) |
| O(26)-C(26)  | 1.353(4) | O(17A)-C(17)-O(17B) | 122.4(3) |
| O(27A)-C(27) | 1.275(3) | O(17A)-C(17)-C(11)  | 119.0(3) |
| O(27B)-C(27) | 1.275(3) | O(17B)-C(17)-C(11)  | 118.5(3) |
| C(21)-C(22)  | 1.403(4) | C(22)-C(21)-C(26)   | 117.5(3) |
| C(21)-C(26)  | 1.411(4) | C(22)-C(21)-C(27)   | 122.1(3) |
| C(21)-C(27)  | 1.476(4) | C(26)-C(21)-C(27)   | 120.4(3) |

|             |          |                     |          |
|-------------|----------|---------------------|----------|
| C(22)-C(23) | 1.377(4) | O(22)-C(22)-C(23)   | 118.6(3) |
| C(23)-C(24) | 1.382(4) | O(22)-C(22)-C(21)   | 120.3(3) |
| C(24)-C(25) | 1.371(4) | C(23)-C(22)-C(21)   | 121.1(3) |
| C(25)-C(26) | 1.383(4) | C(22)-C(23)-C(24)   | 119.7(3) |
| N(31)-C(31) | 1.331(4) | C(25)-C(24)-C(23)   | 121.1(3) |
| N(32)-C(31) | 1.308(3) | C(24)-C(25)-C(26)   | 119.5(3) |
| N(32)-C(33) | 1.358(4) | O(26)-C(26)-C(25)   | 118.6(3) |
| N(33)-C(33) | 1.323(3) | O(26)-C(26)-C(21)   | 120.3(3) |
| N(34)-C(35) | 1.314(4) | C(25)-C(26)-C(21)   | 121.1(3) |
| N(34)-C(33) | 1.348(4) | O(27A)-C(27)-O(27B) | 122.5(3) |
| N(35)-C(35) | 1.331(4) | O(27A)-C(27)-C(21)  | 118.5(3) |
| N(36)-C(35) | 1.359(4) | O(27B)-C(27)-C(21)  | 119.0(3) |
| N(36)-C(31) | 1.363(4) | C(31)-N(32)-C(33)   | 115.0(3) |
| N(41)-C(41) | 1.316(4) | C(35)-N(34)-C(33)   | 114.8(3) |
| N(42)-C(41) | 1.330(3) | C(35)-N(36)-C(31)   | 118.6(3) |
| N(42)-C(43) | 1.362(4) | N(32)-C(31)-N(31)   | 121.8(3) |
| N(43)-C(43) | 1.320(3) | N(32)-C(31)-N(36)   | 122.3(3) |
| N(44)-C(45) | 1.314(4) | N(31)-C(31)-N(36)   | 116.0(3) |
| N(44)-C(43) | 1.357(4) | N(33)-C(33)-N(34)   | 117.5(3) |
| N(45)-C(45) | 1.330(4) | N(33)-C(33)-N(32)   | 115.7(3) |
| N(46)-C(41) | 1.362(4) | N(34)-C(33)-N(32)   | 126.8(3) |
| N(46)-C(45) | 1.364(4) | N(34)-C(35)-N(35)   | 121.0(3) |
|             |          | N(34)-C(35)-N(36)   | 122.5(3) |
|             |          | N(35)-C(35)-N(36)   | 116.5(3) |
|             |          | C(41)-N(42)-C(43)   | 115.4(3) |
|             |          | C(45)-N(44)-C(43)   | 115.2(3) |
|             |          | C(41)-N(46)-C(45)   | 119.7(3) |
|             |          | N(41)-C(41)-N(42)   | 121.7(3) |
|             |          | N(41)-C(41)-N(46)   | 117.2(3) |
|             |          | N(42)-C(41)-N(46)   | 121.1(3) |
|             |          | N(43)-C(43)-N(44)   | 117.2(3) |
|             |          | N(43)-C(43)-N(42)   | 116.5(3) |
|             |          | N(44)-C(43)-N(42)   | 126.3(3) |
|             |          | N(44)-C(45)-N(45)   | 121.0(3) |
|             |          | N(44)-C(45)-N(46)   | 122.1(3) |
|             |          | N(45)-C(45)-N(46)   | 116.9(3) |

Symmetry transformations used to generate equivalent atoms:

Table 4. Anisotropic displacement parameters ( $\text{\AA}^2 \times 10^3$ ) for **7**. The anisotropic displacement factor exponent takes the form:  $-2\pi^2 [h^2 a^{*2} U^{11} + \dots + 2 h k a^* b^* U^{12}]$

|        | U <sup>11</sup> | U <sup>22</sup> | U <sup>33</sup> | U <sup>23</sup> | U <sup>13</sup> | U <sup>12</sup> |
|--------|-----------------|-----------------|-----------------|-----------------|-----------------|-----------------|
| O(12)  | 36(2)           | 57(2)           | 39(1)           | -8(1)           | 22(1)           | -4(1)           |
| O(16)  | 28(2)           | 40(2)           | 29(1)           | 7(1)            | 12(1)           | 8(1)            |
| O(17A) | 56(2)           | 49(2)           | 24(1)           | -8(1)           | 25(1)           | -25(1)          |
| O(17B) | 48(2)           | 27(1)           | 19(1)           | 1(1)            | 6(1)            | 6(1)            |
| C(11)  | 22(2)           | 17(2)           | 13(2)           | -5(2)           | 6(2)            | -3(2)           |
| C(12)  | 25(2)           | 28(2)           | 23(2)           | -14(2)          | 14(2)           | -6(2)           |
| C(13)  | 27(2)           | 25(2)           | 26(2)           | 1(2)            | 2(2)            | 9(2)            |
| C(14)  | 44(3)           | 24(2)           | 17(2)           | 0(2)            | 11(2)           | -1(2)           |
| C(15)  | 30(2)           | 22(2)           | 23(2)           | -2(2)           | 15(2)           | -3(2)           |
| C(16)  | 26(2)           | 13(2)           | 18(2)           | -1(2)           | 10(2)           | 3(2)            |
| C(17)  | 40(2)           | 18(2)           | 16(2)           | -6(2)           | 9(2)            | -5(2)           |
| O(22)  | 33(2)           | 42(2)           | 37(1)           | 4(1)            | 23(1)           | 3(1)            |
| O(26)  | 28(2)           | 36(2)           | 25(1)           | 3(1)            | 13(1)           | 5(1)            |



|        |       |       |       |       |       |       |
|--------|-------|-------|-------|-------|-------|-------|
| O(27A) | 36(2) | 30(1) | 26(1) | 5(1)  | 8(1)  | 6(1)  |
| O(27B) | 43(2) | 33(2) | 23(1) | 1(1)  | 18(1) | -8(1) |
| C(21)  | 25(2) | 13(2) | 19(2) | -3(2) | 10(2) | -5(2) |
| C(22)  | 28(2) | 25(2) | 20(2) | -1(2) | 14(2) | -1(2) |
| C(23)  | 30(2) | 31(2) | 30(2) | 2(2)  | 9(2)  | 7(2)  |
| C(24)  | 38(2) | 27(2) | 24(2) | 7(2)  | 11(2) | 7(2)  |
| C(25)  | 34(2) | 29(2) | 21(2) | -3(2) | 15(2) | -8(2) |
| C(26)  | 21(2) | 22(2) | 21(2) | -3(2) | 7(2)  | -2(2) |
| C(27)  | 36(2) | 21(2) | 14(2) | -4(2) | 8(2)  | -6(2) |
| N(31)  | 25(2) | 35(2) | 25(2) | 9(1)  | 13(1) | 6(1)  |
| N(32)  | 23(2) | 22(2) | 15(1) | 5(1)  | 9(1)  | -3(1) |
| N(33)  | 30(2) | 31(2) | 27(1) | 7(1)  | 14(1) | 2(1)  |
| N(34)  | 27(2) | 25(2) | 22(2) | 5(1)  | 11(1) | 0(1)  |
| N(35)  | 28(2) | 37(2) | 34(2) | 8(1)  | 14(2) | 6(2)  |
| N(36)  | 27(2) | 22(2) | 20(1) | 4(1)  | 12(1) | -1(1) |
| C(31)  | 21(2) | 19(2) | 14(2) | -5(2) | 8(2)  | -3(2) |
| C(33)  | 33(2) | 15(2) | 15(2) | -3(2) | 7(2)  | -7(2) |
| C(35)  | 17(2) | 24(2) | 24(2) | -4(2) | 5(2)  | -3(2) |
| N(41)  | 30(2) | 33(2) | 24(2) | 9(1)  | 12(1) | 4(1)  |
| N(42)  | 26(2) | 21(2) | 18(1) | 1(1)  | 9(1)  | -1(1) |
| N(43)  | 32(2) | 34(2) | 25(1) | 13(1) | 15(1) | 6(1)  |
| N(44)  | 26(2) | 26(2) | 21(2) | 4(1)  | 6(1)  | 0(1)  |
| N(45)  | 29(2) | 40(2) | 31(2) | 13(1) | 13(2) | 9(2)  |
| N(46)  | 25(2) | 23(2) | 17(1) | 5(1)  | 5(1)  | 3(1)  |
| C(41)  | 25(2) | 21(2) | 14(2) | -2(2) | 4(2)  | -7(2) |
| C(43)  | 30(2) | 18(2) | 14(2) | -4(2) | 5(2)  | -5(2) |
| C(45)  | 21(2) | 27(2) | 23(2) | -5(2) | 8(2)  | -     |
| 2(2)   |       |       |       |       |       |       |

Table 5. Hydrogen coordinates ( $\times 10^4$ ) and isotropic displacement parameters ( $\text{\AA}^2 \times 10^3$ ) for **7**.

|        | x     | y     | z     | U(eq) |
|--------|-------|-------|-------|-------|
| H(12)  | 6824  | 6698  | 8016  | 63    |
| H(16)  | 9967  | 5630  | 8092  | 48    |
| H(13)  | 6536  | 9010  | 6648  | 34    |
| H(14)  | 7758  | 9323  | 6192  | 34    |
| H(15)  | 9319  | 8009  | 6698  | 28    |
| H(22)  | 4566  | 6703  | 5730  | 52    |
| H(26)  | 7423  | 5590  | 5401  | 44    |
| H(23)  | 3952  | 9032  | 4316  | 38    |
| H(24)  | 4990  | 9430  | 3714  | 36    |
| H(25)  | 6532  | 8128  | 4052  | 32    |
| H(31A) | 9375  | 6460  | 10581 | 33    |
| H(31B) | 8571  | 7563  | 10076 | 33    |
| H(33A) | 9404  | 10194 | 8439  | 34    |
| H(33B) | 10439 | 9949  | 8414  | 34    |
| H(35A) | 12779 | 6591  | 10034 | 39    |
| H(35B) | 12448 | 5768  | 10559 | 39    |
| H(36)  | 10859 | 6119  | 10570 | 26    |
| H(41A) | 7910  | 3363  | 6716  | 34    |
| H(41B) | 8723  | 2219  | 7181  | 34    |
| H(43A) | 8179  | -206  | 8997  | 35    |
| H(43B) | 7191  | 82    | 9086  | 35    |
| H(45A) | 4831  | 3623  | 7624  | 40    |
| H(45B) | 5082  | 4439  | 7060  | 40    |
| H(46)  | 6504  | 3943  | 6879  | 27    |

## Thermo gravimetric Analysis

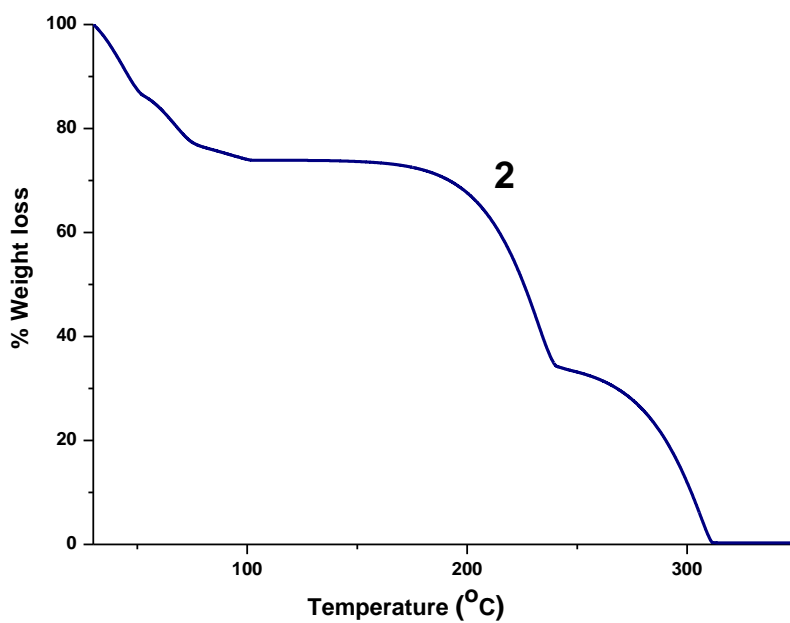

**Figure 7.** TG plot for the complex 2.

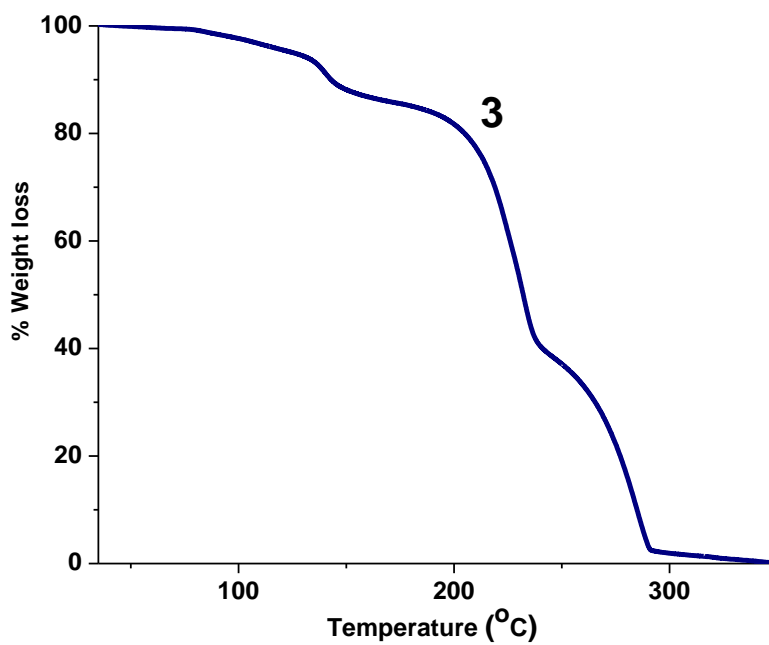

**Figure 8.** TG plot for the complex 3.

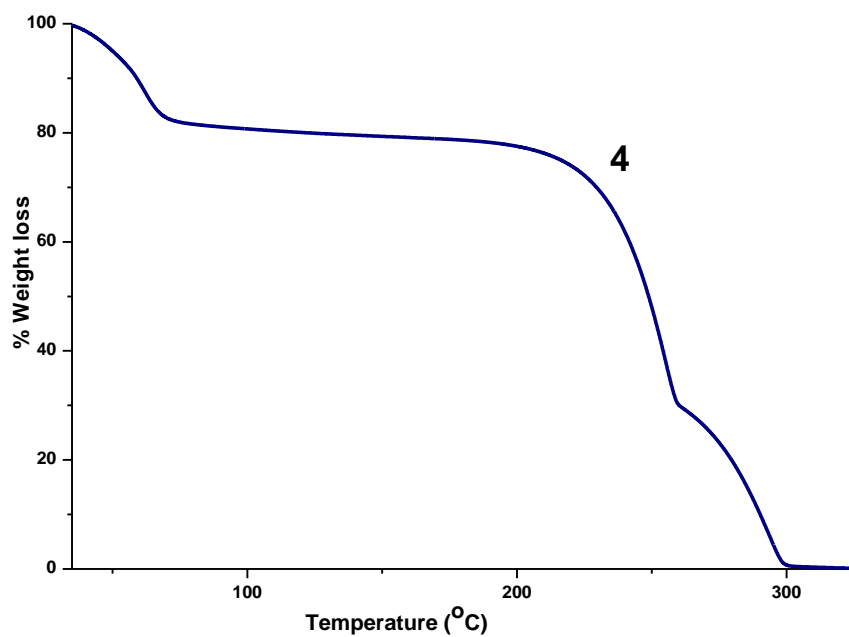

**Figure 9.** TG plot for the complex 4.

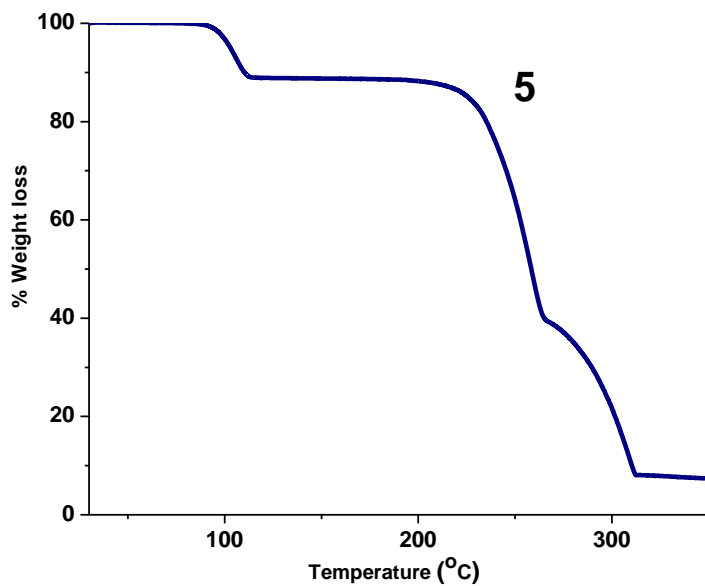

**Figure 10.** TG plot for the complex 5.

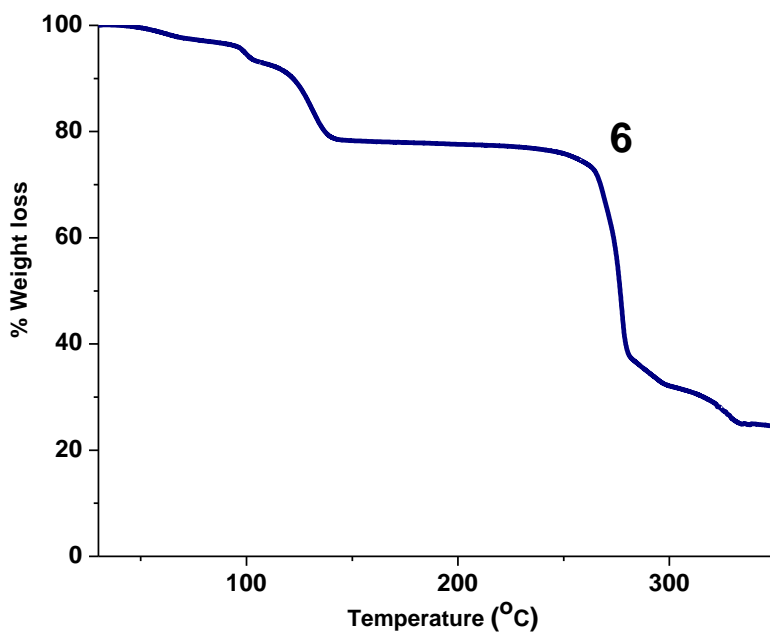

**Figure 11.** TG plot for the complex 6.

### PXRD Analysis

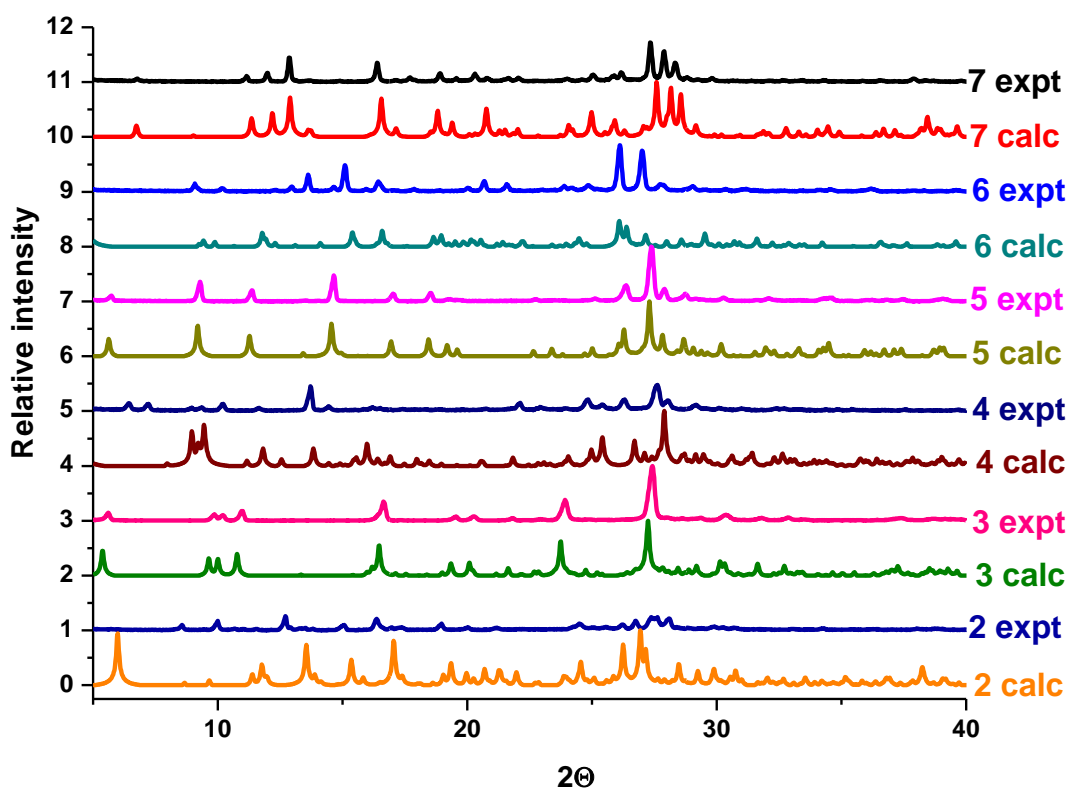

**Figure 12.** Combined PXRD plot for the complexes. The deviation of the experimental and the calculated pattern for the complexes 2 and 4 is due to the loss of solvent molecules from the crystal lattice, as evident from the TG plots.

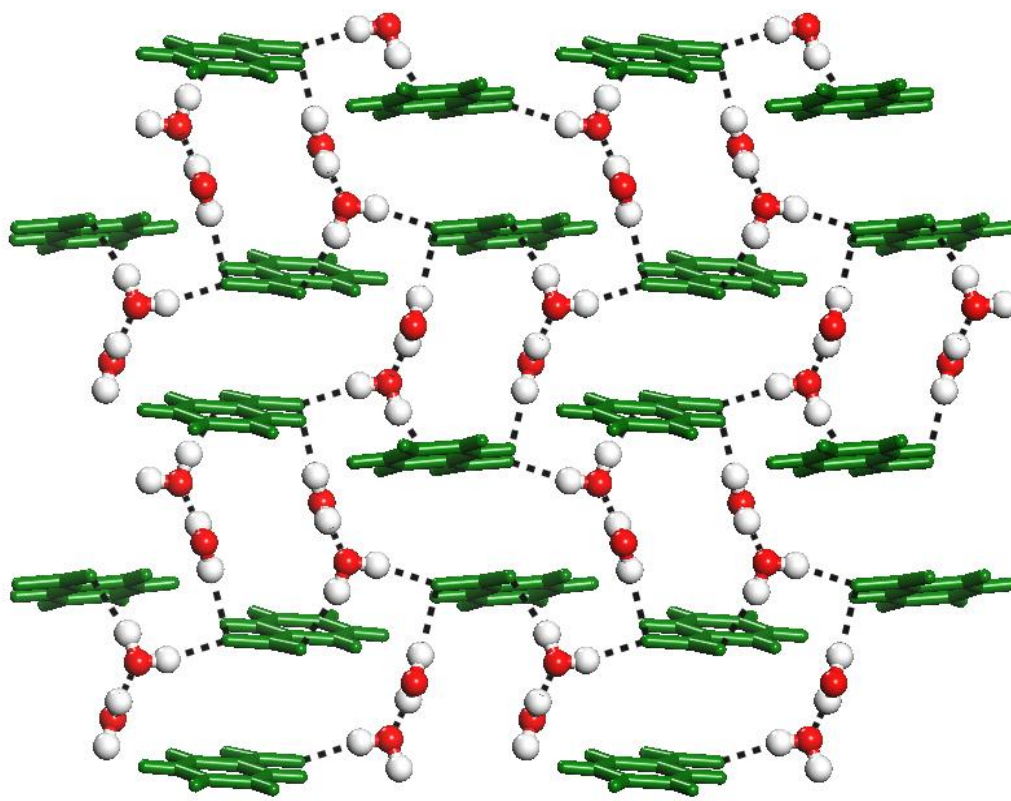

(a)

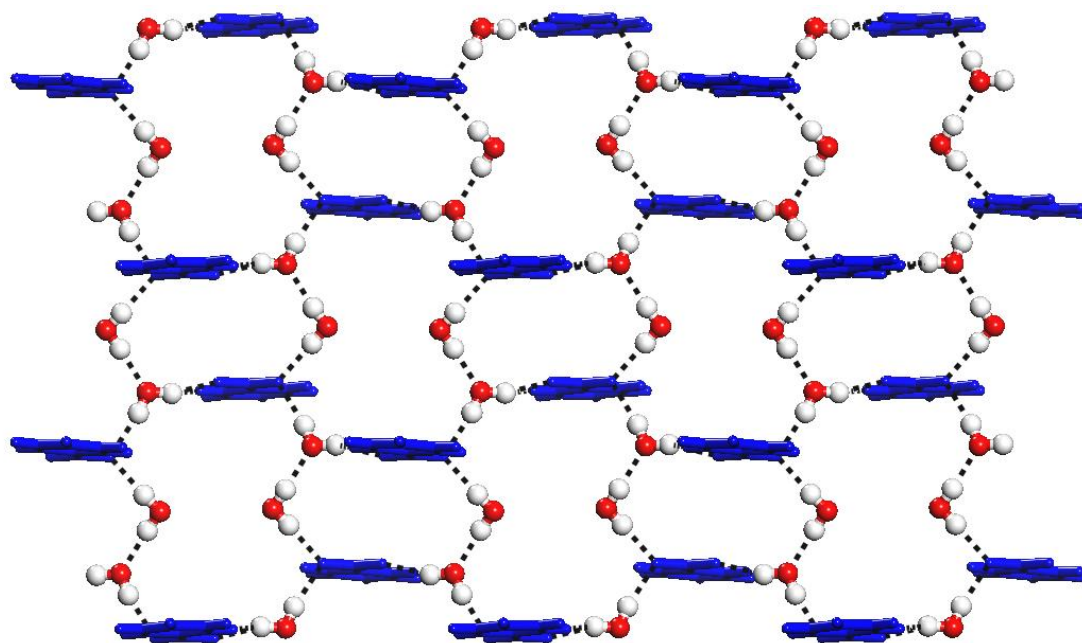

(b)

**Figure 13.** The arrangement of water molecules in the crystal lattice of the two polymorphic structures of the **BA-ML** complex. (a) Monoclinic form, (b) orthorhombic form.

**Table S1.** Conformational analysis of dihydroxybenzoic acids.\*

| DHBA         | Refcode      | <i>Syn-syn</i> | <i>Anti-anti</i> | <i>Syn-anti</i> |
|--------------|--------------|----------------|------------------|-----------------|
| <b>23DHB</b> | MOZDEL       | ✓              |                  |                 |
| <b>24DHB</b> | ACHRES       | ✓              |                  |                 |
|              | TEVWOH       | ✓              |                  |                 |
|              | DEYREF       | ✓              |                  |                 |
|              | GIDLUB       | ✓              |                  |                 |
|              | HUHDUK       | ✓              |                  |                 |
|              | HUHFAS       | ✓              |                  |                 |
|              | IDUBUF       | ✓              |                  |                 |
|              | MOZCIO       | ✓              |                  |                 |
|              | HEFTUI       |                |                  | ✓               |
|              | TEZXIG       |                |                  | ✓               |
| <b>25DHB</b> | DUCROJ       | ✓              |                  |                 |
|              | XAQQOW       | ✓              |                  |                 |
|              | ZEZHIV       | ✓              |                  |                 |
|              | CUSZIA       | ✓              |                  |                 |
|              | EWINAZ       | ✓              |                  |                 |
|              | RACBED       | ✓              |                  |                 |
|              | AJAGUN       |                |                  | ✓               |
|              | DAVPAS       |                |                  | ✓               |
|              | MOZDIP       |                |                  | ✓               |
|              | NEKDEN       |                |                  | ✓               |
|              | NURFOW       |                |                  | ✓               |
|              | GULLUF       |                |                  | ✓               |
|              | <b>26DHB</b> | DEXTOQ         | ✓                |                 |
| KEZHED       |              | ✓              |                  |                 |
| KEZHAZ       |              | ✓              |                  |                 |
| QIRGUT       |              | ✓              |                  |                 |
| LEWRUA       |              | ✓              |                  |                 |
| LEWPOS       |              | ✓              |                  |                 |
| LEZJIH       |              | ✓              |                  |                 |
| LOLDAS       |              | ✓              |                  |                 |
| LOLDEW       |              | ✓              |                  |                 |
| REZHAG       |              | ✓              |                  |                 |
| RIBLUJ       |              | ✓              |                  |                 |
| HUZDOV       |              | ✓              |                  | ✓               |

\*When the –OH group is pointing towards the carboxyl group it is considered as *syn* conformation and when pointing away it is considered as *anti*.
